# Supplementary material for: Enzymatic diastereo- and enantioselective synthesis of α-alkyl-α,β-dihydroxyketones
Source: Royal Society of Chemistry journal article supplement (doi:10.1039/c1ob05928a), 2011-01-01

# Enzymatic diastereo- and enantioselective synthesis of $\alpha$ -alkyl- $\alpha,\beta$ -dihydroxyketones

Pier Paolo Giovannini,<sup>a\*</sup> Giancarlo Fantin,<sup>a</sup> Alessandro Massi,<sup>a</sup> Valentina Venturi,<sup>b</sup>  
Alessandro Medici<sup>b</sup> and Paola Pedrini<sup>b</sup>

<sup>a</sup> *Department of Chemistry, University of Ferrara, Via L. Borsari 46, 44121 Ferrara, Italy*

<sup>b</sup> *Department of Biology and Evolution, University of Ferrara, C.so Ercole I d'Este 32, 44121 Ferrara, Italy*

*Fax: (+39)-0532-240709*

*e-mail: gvnpppl@unife.it*

## Supporting information

### Content:

<sup>1</sup>H and <sup>13</sup>C NMR spectra

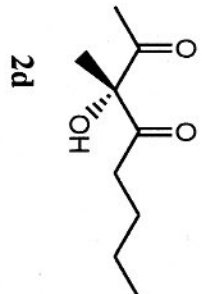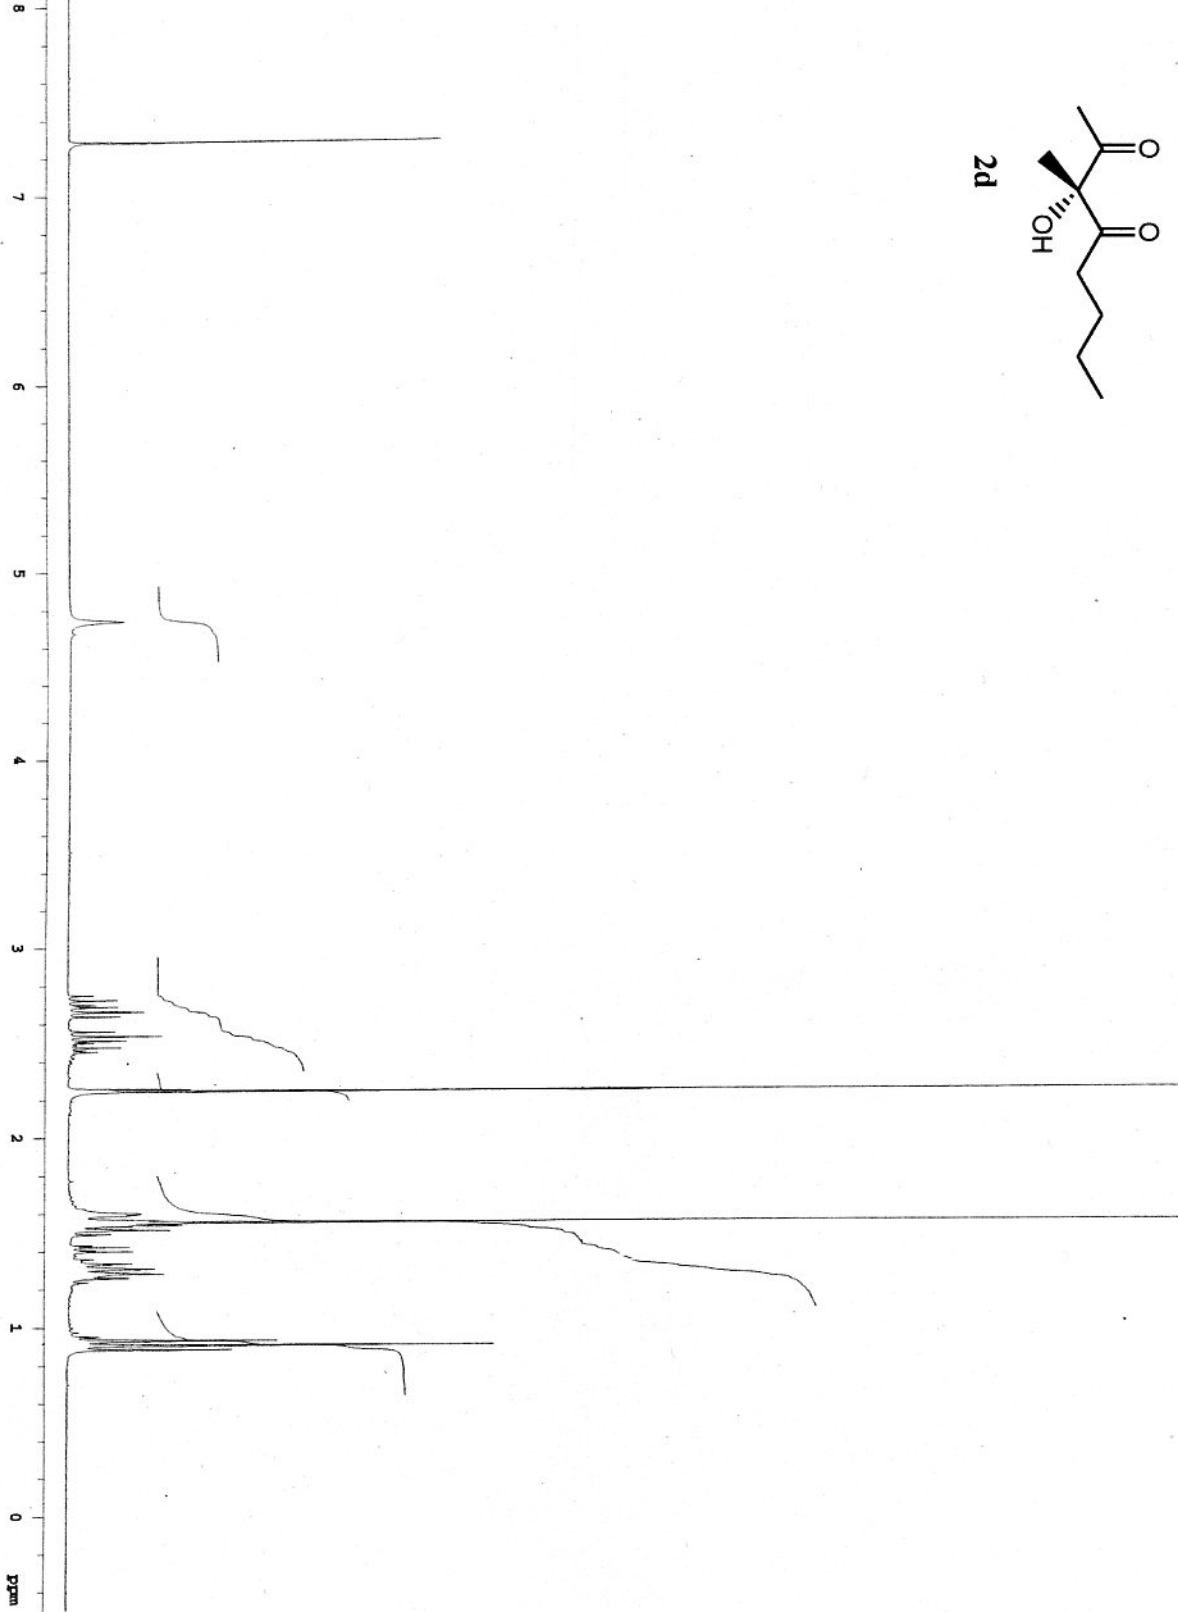

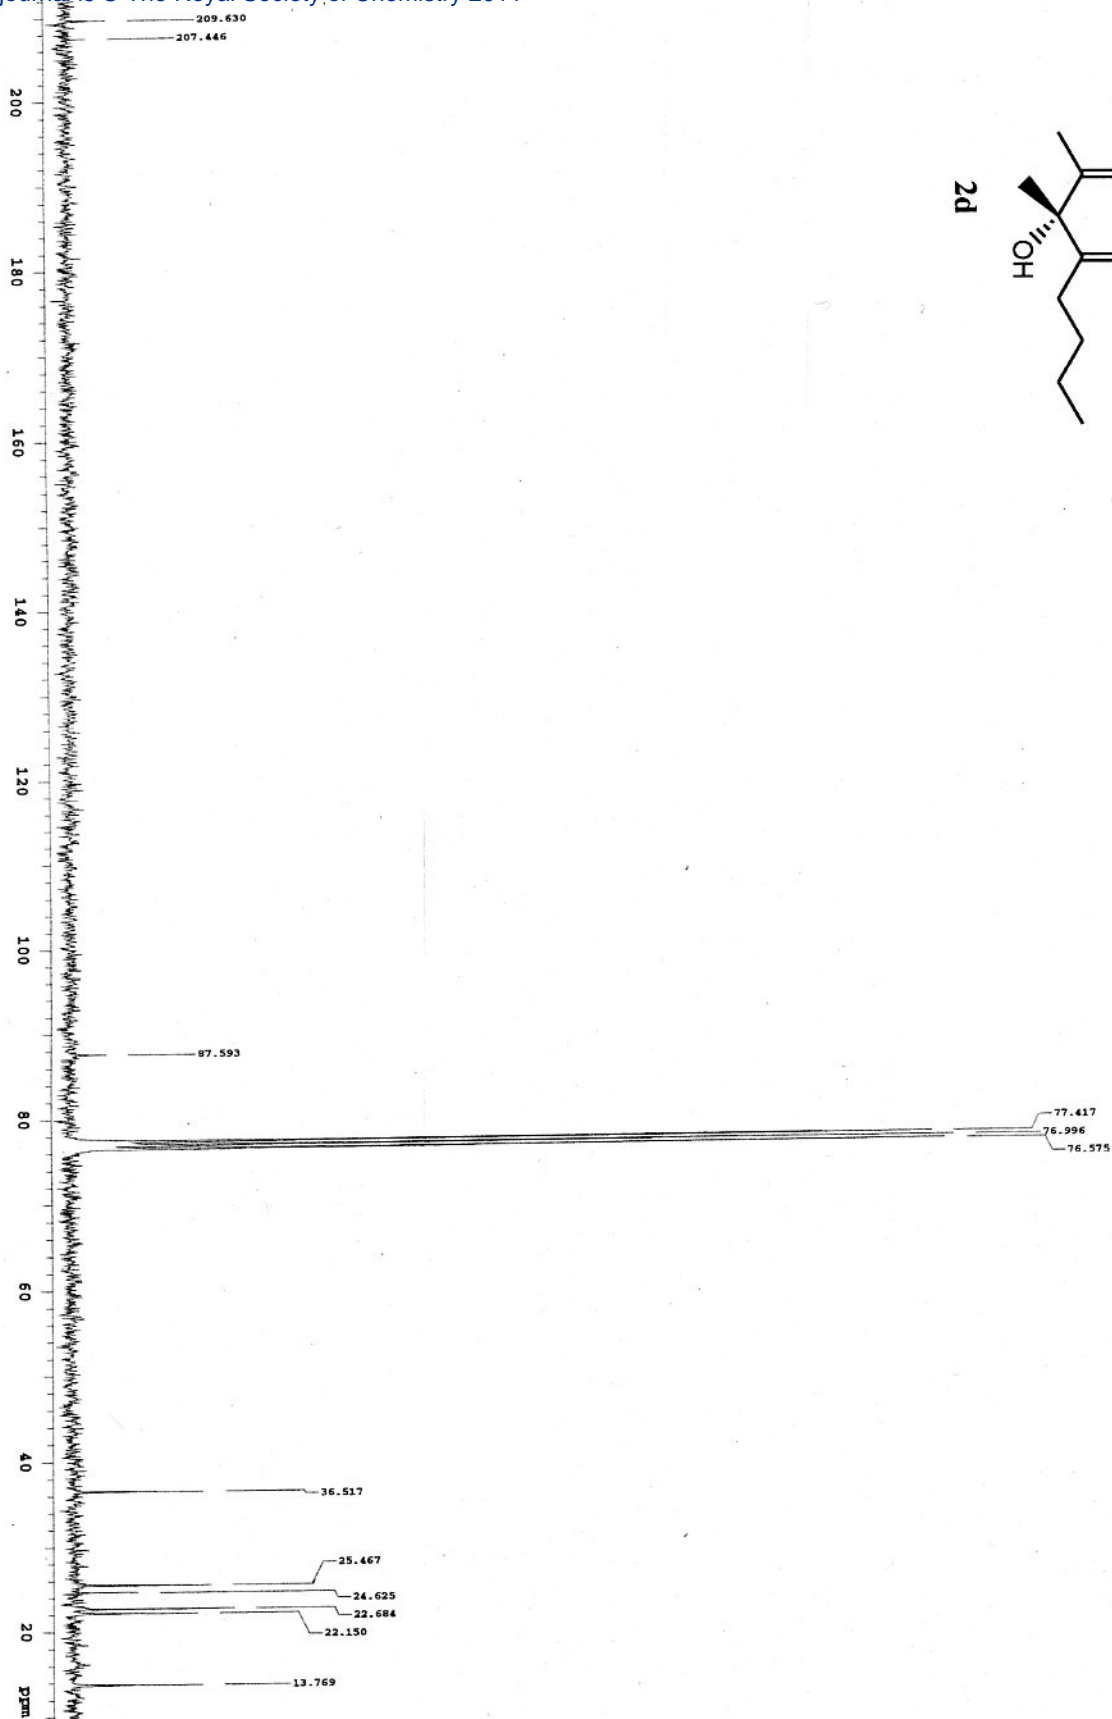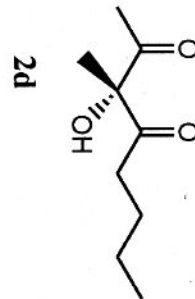

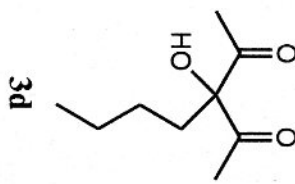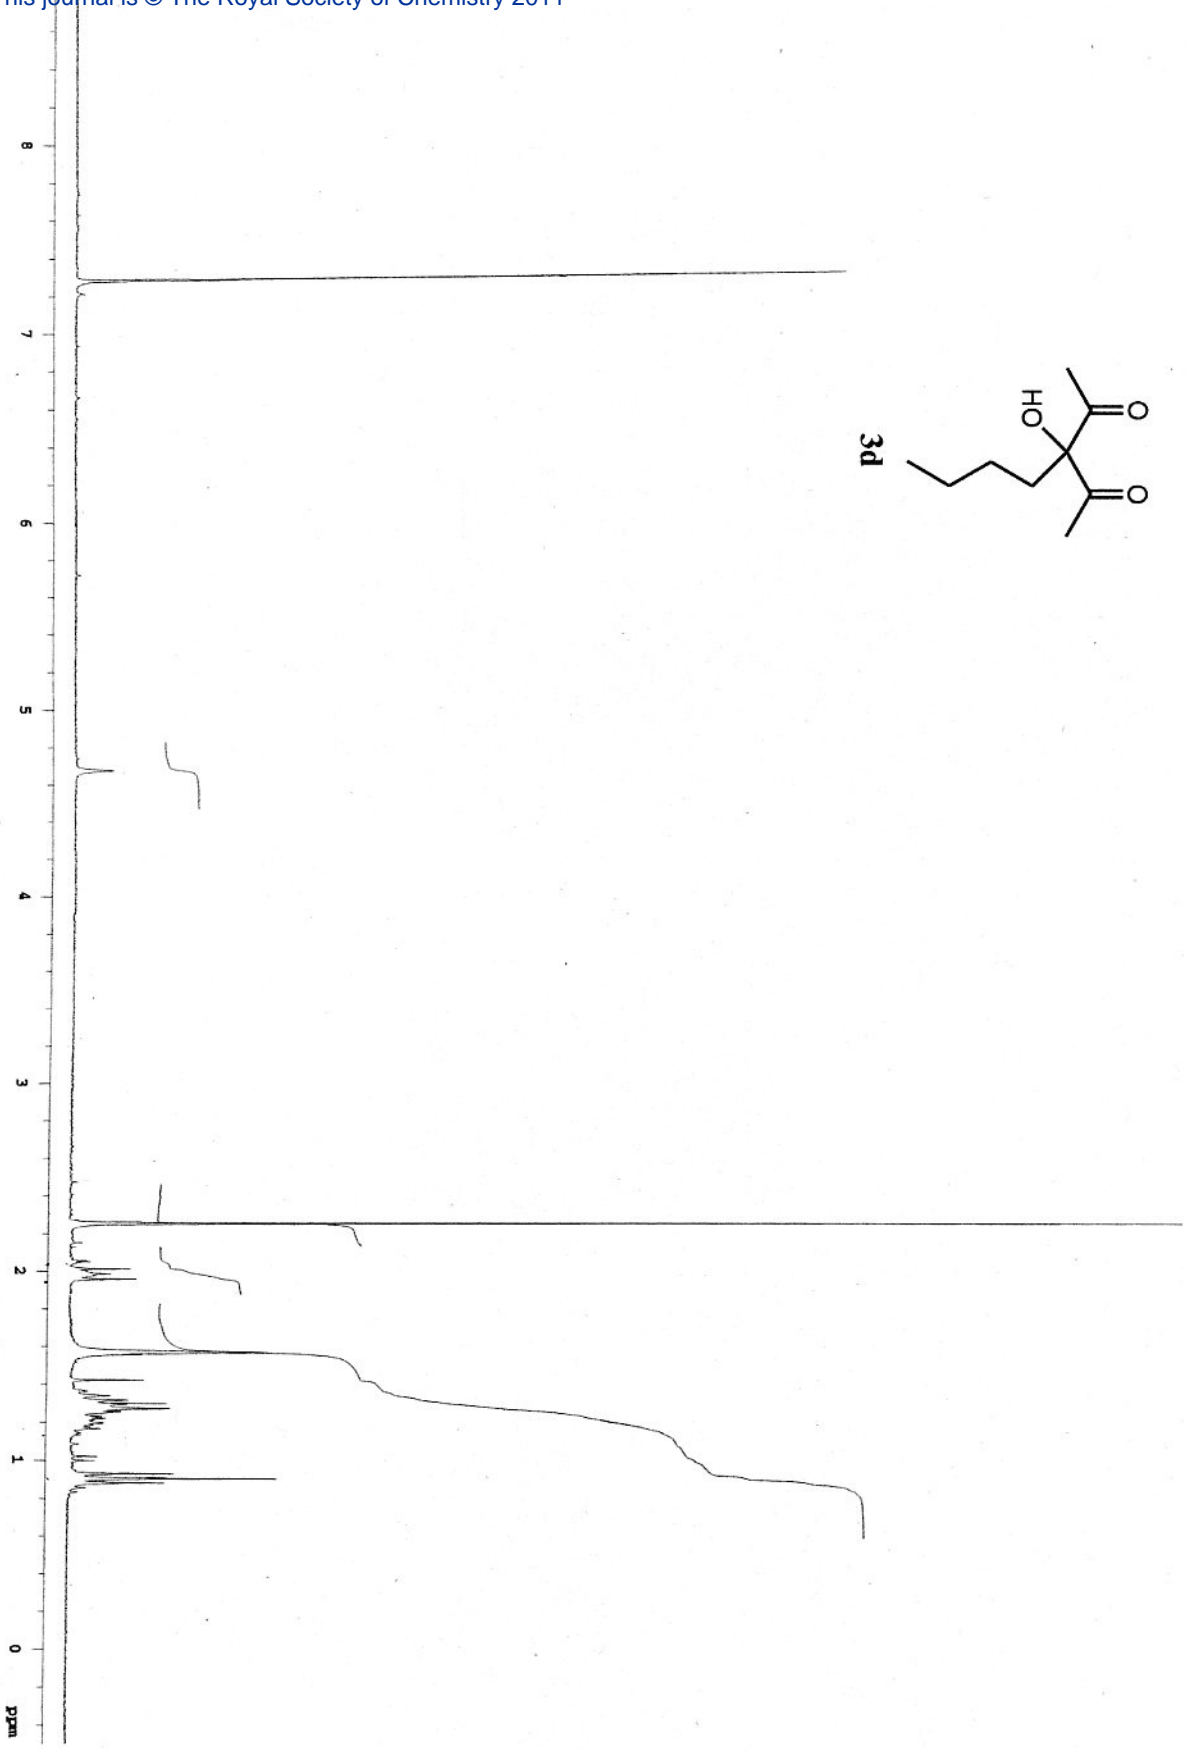

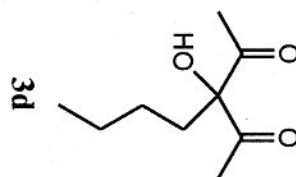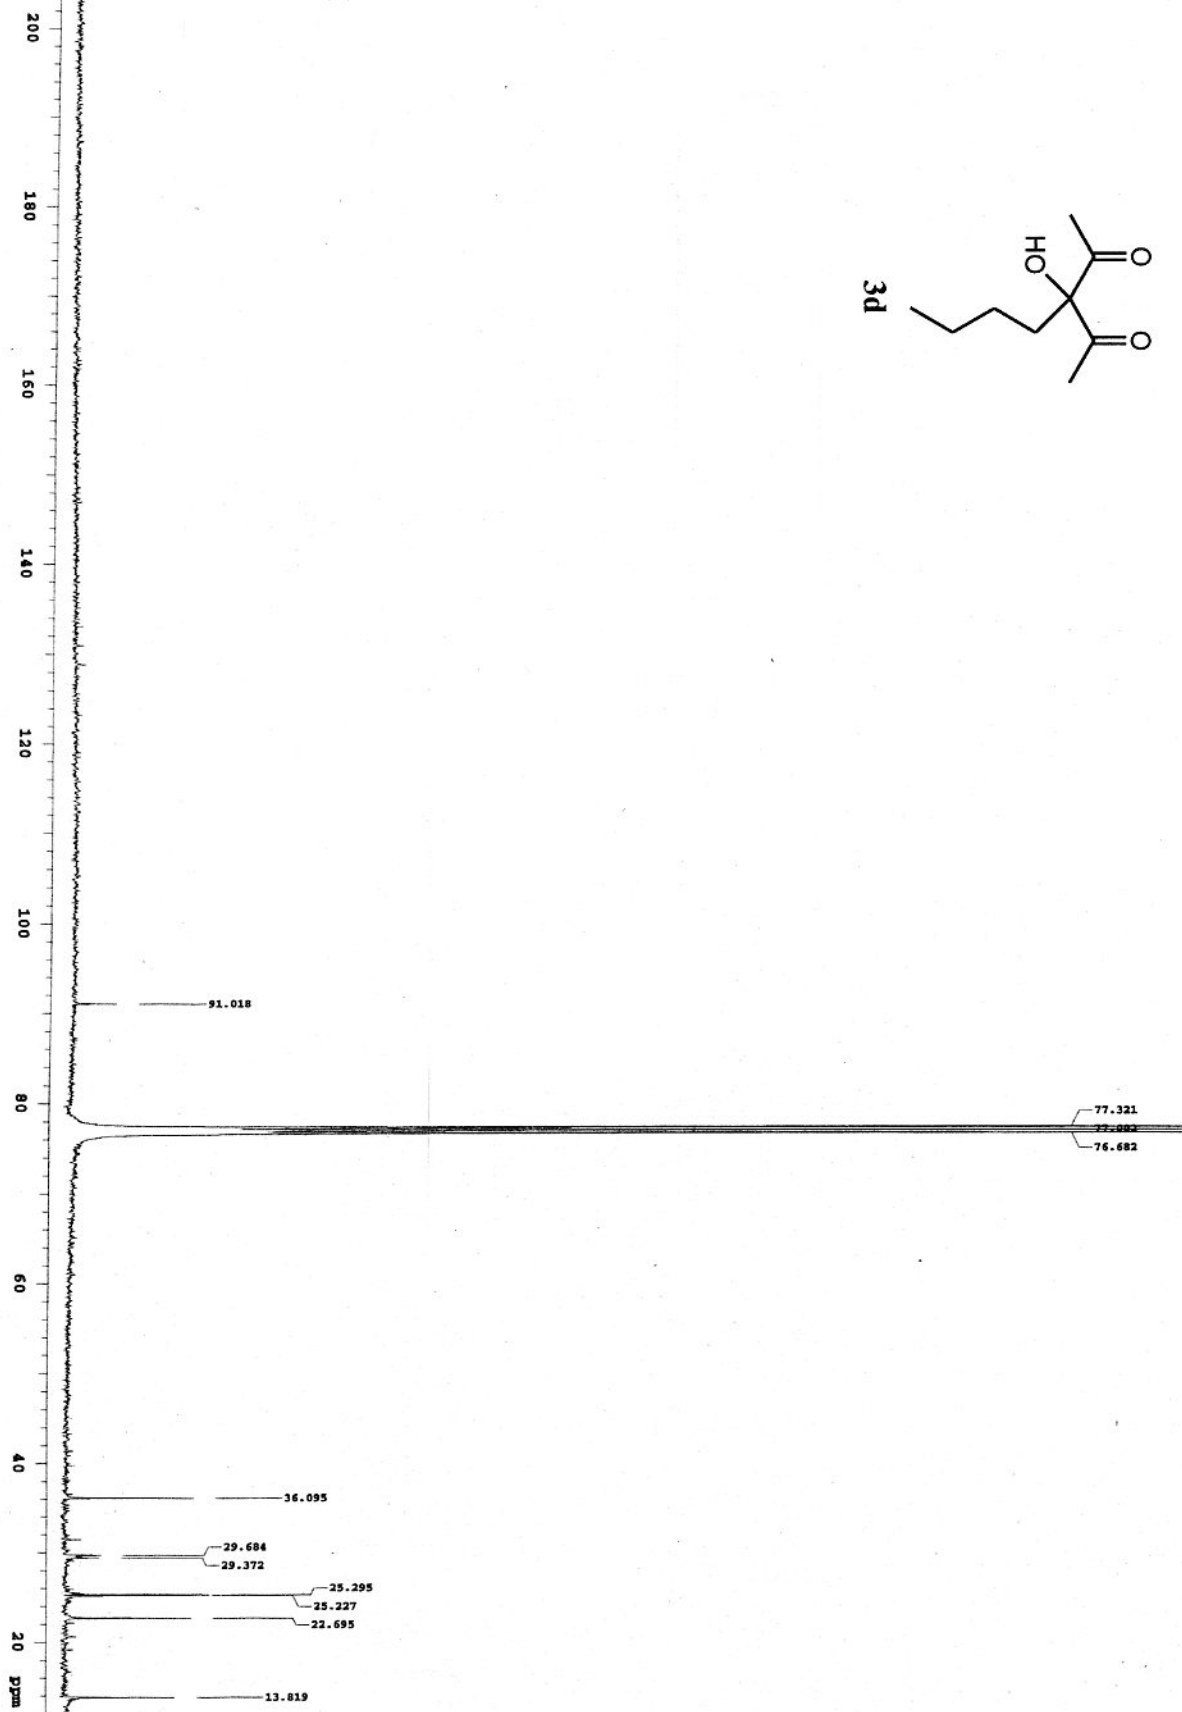

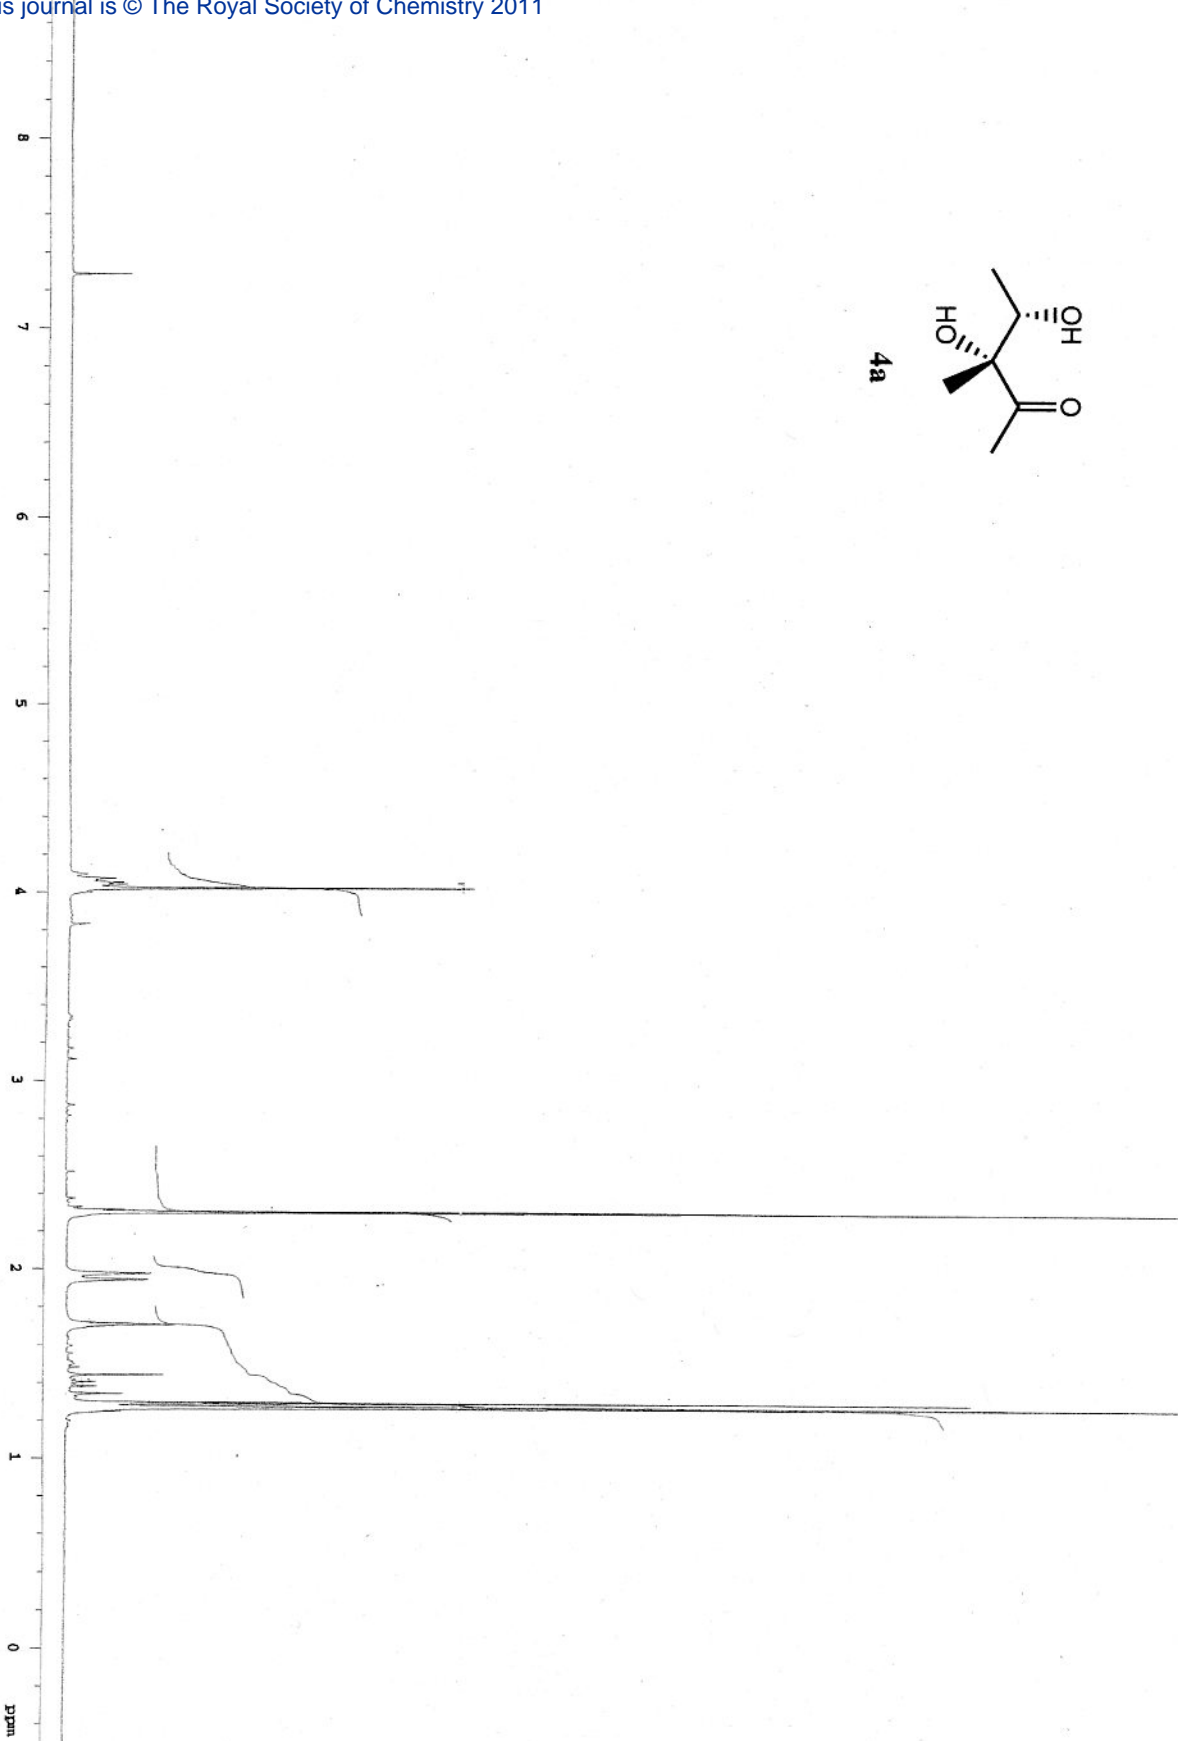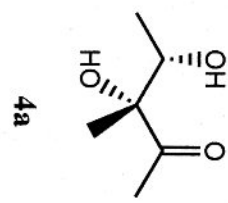

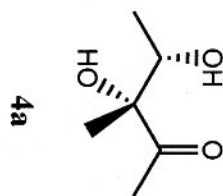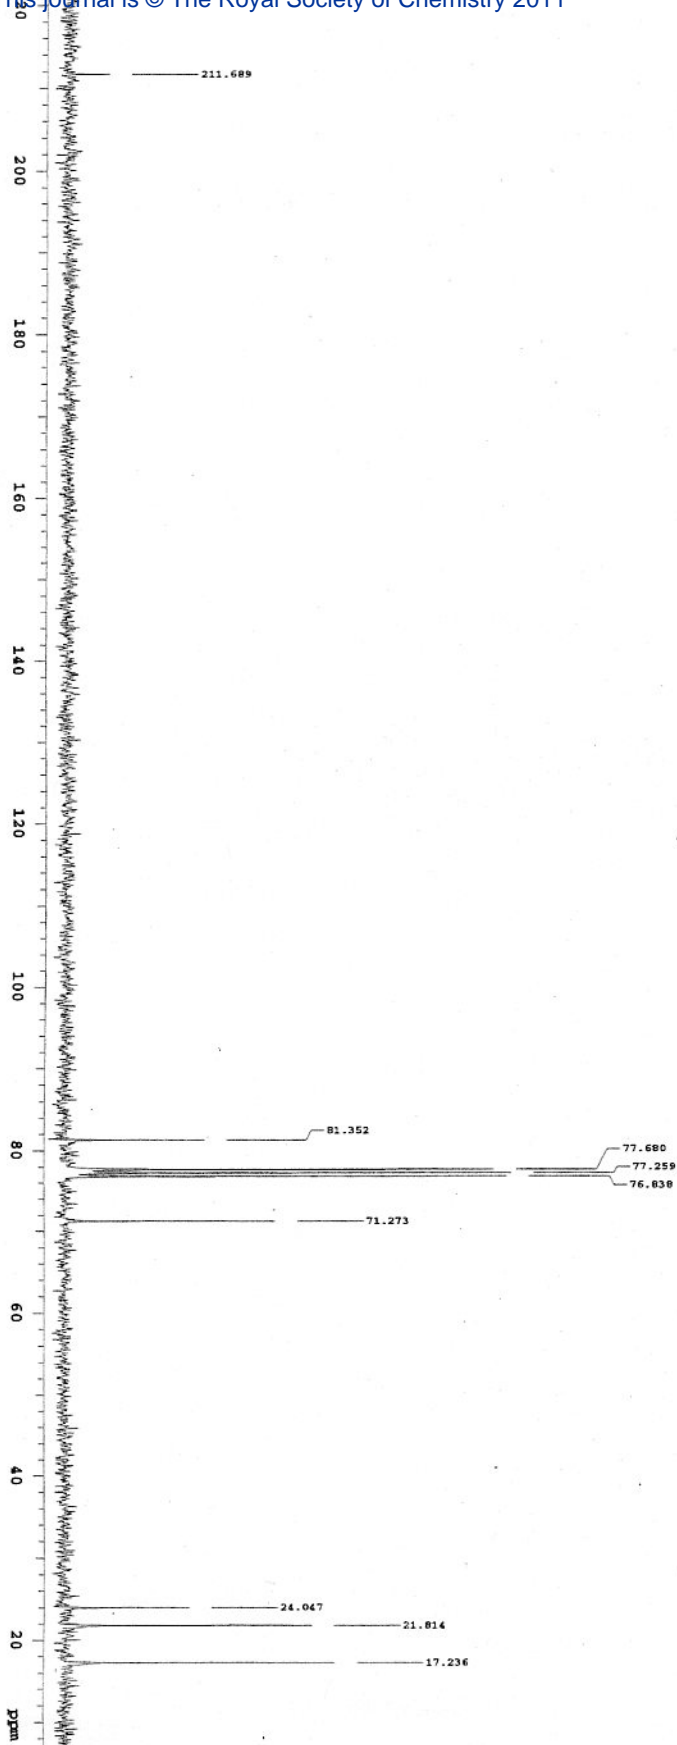

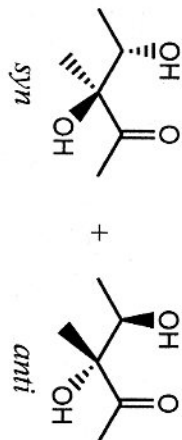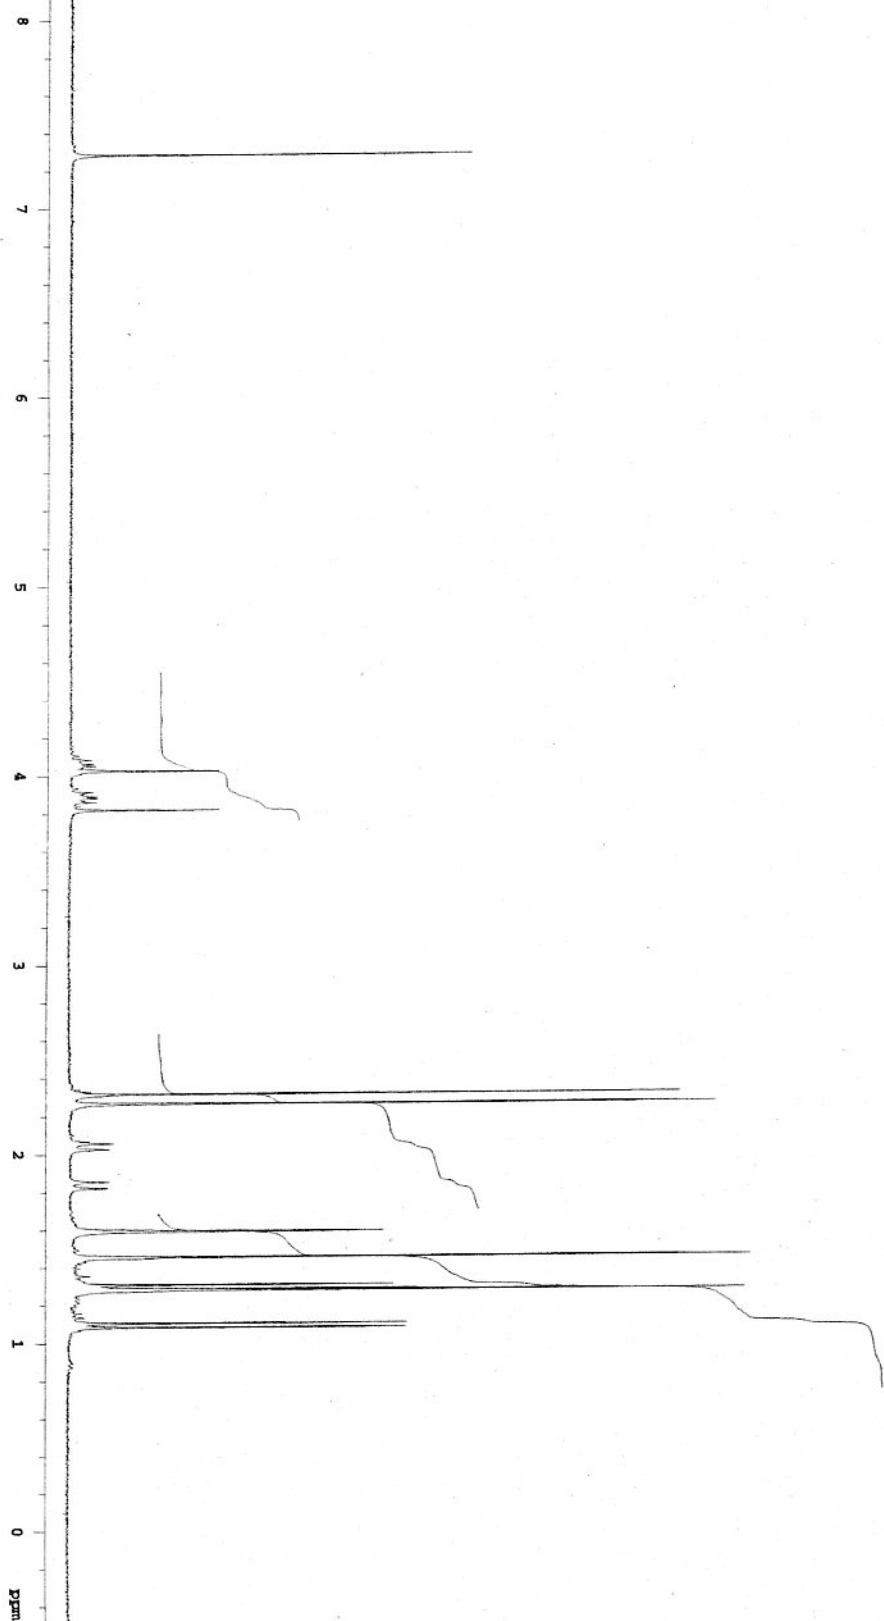



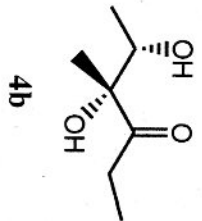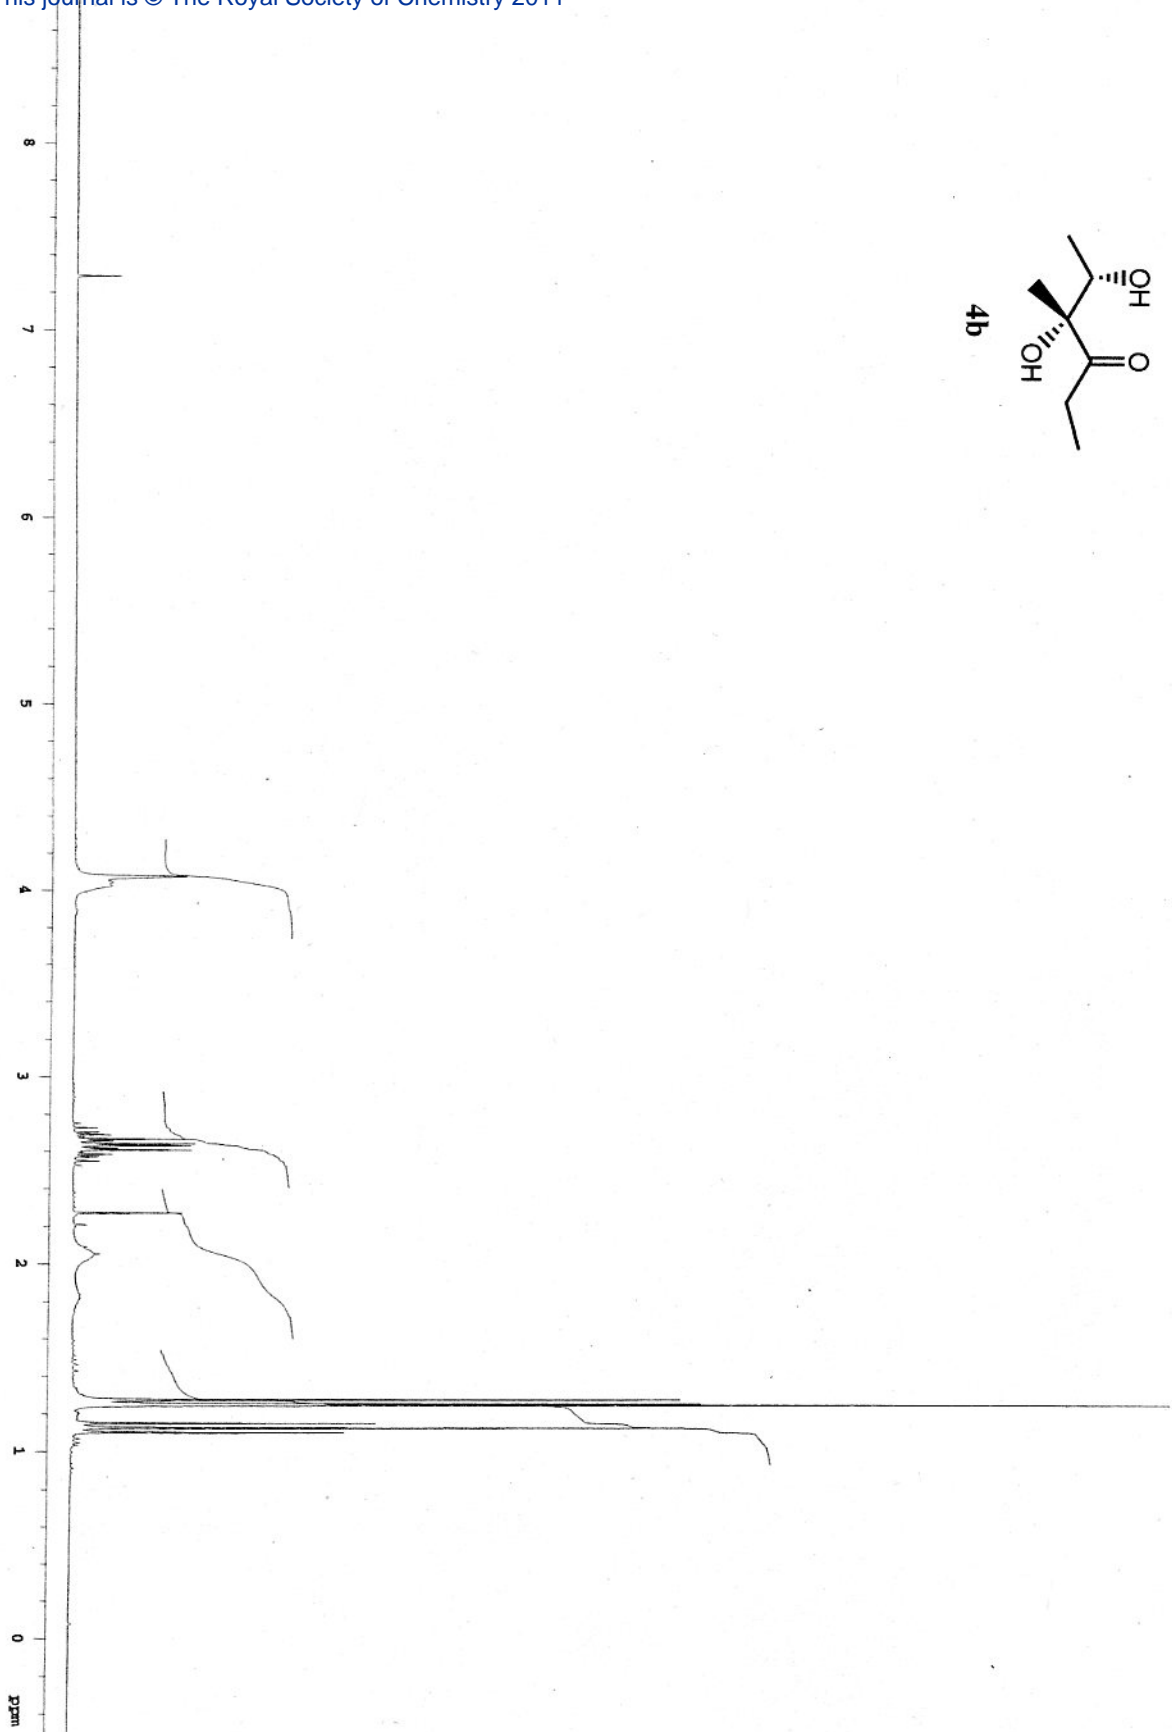

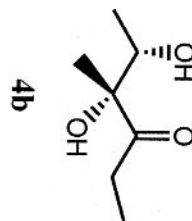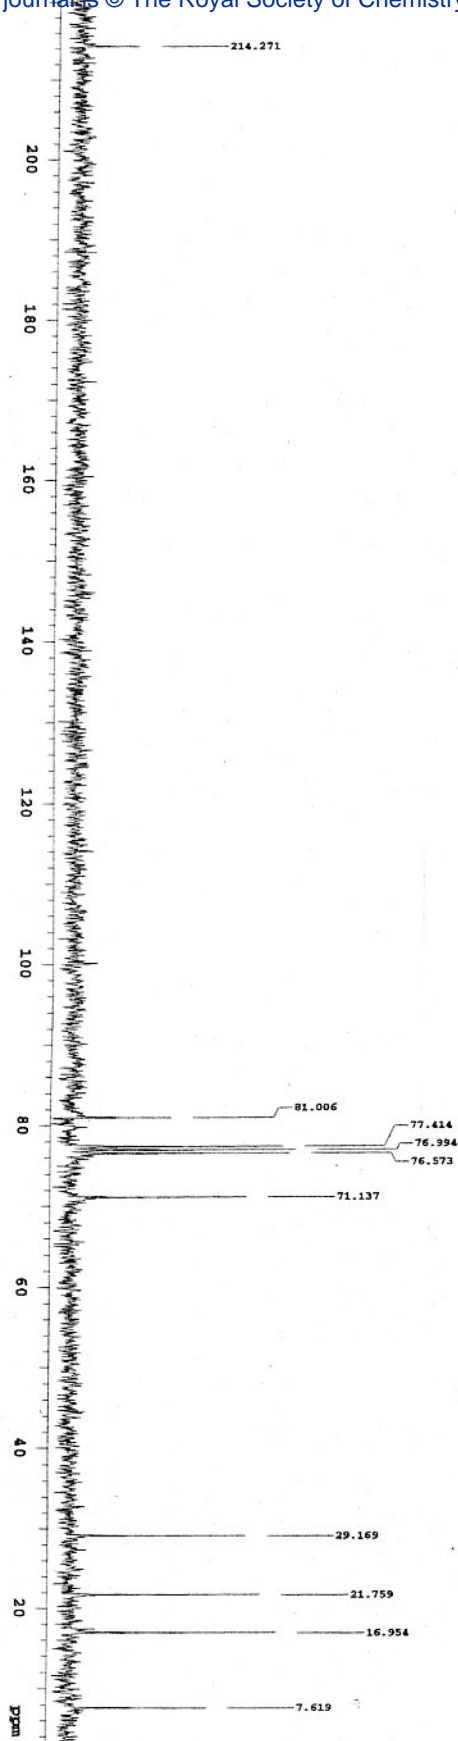

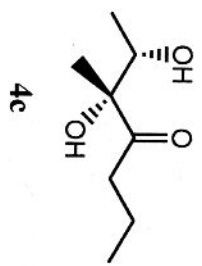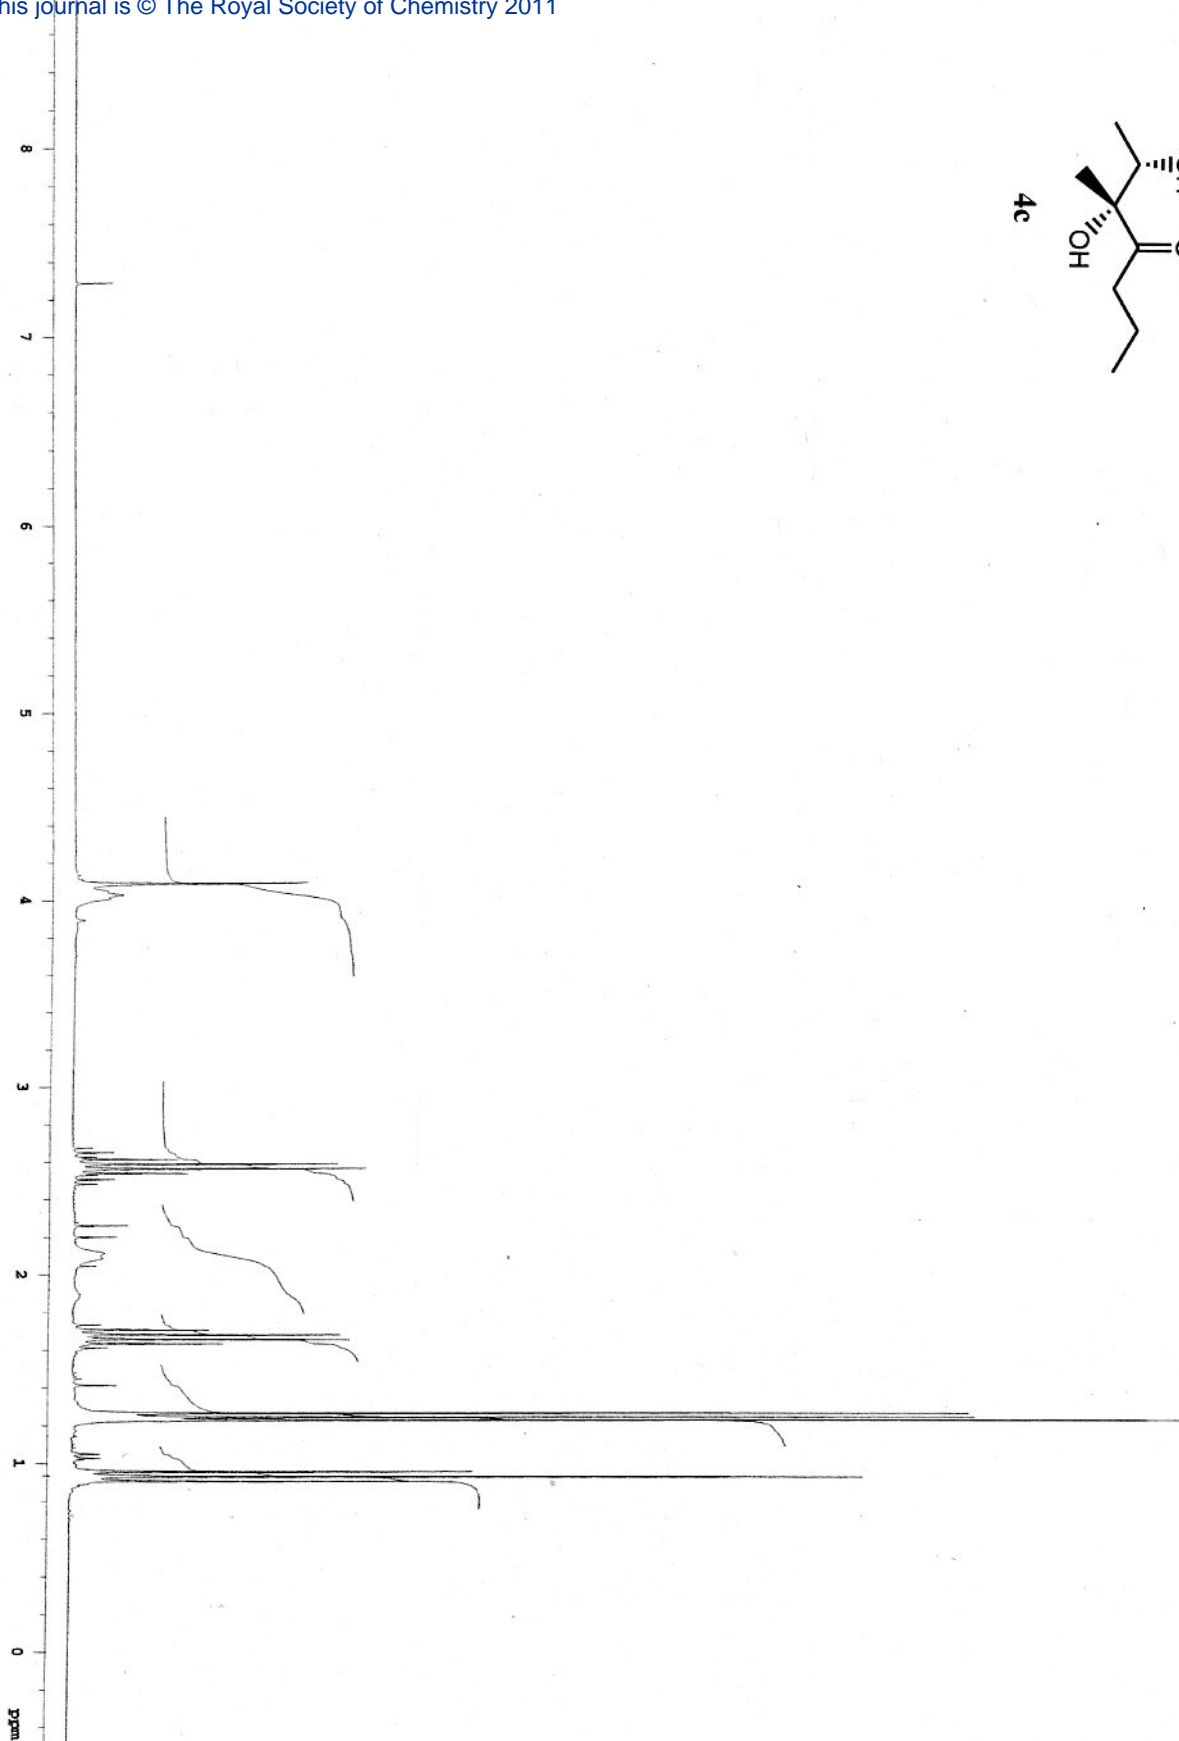

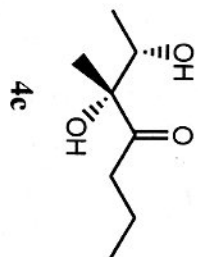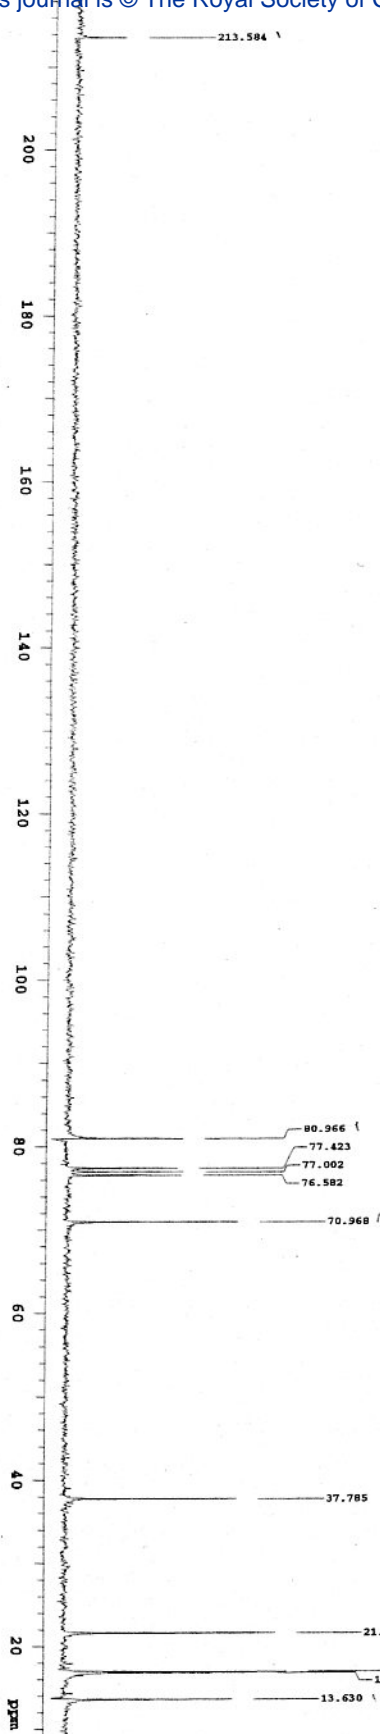

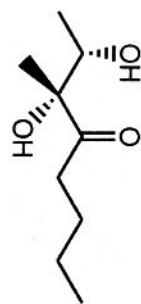

4d

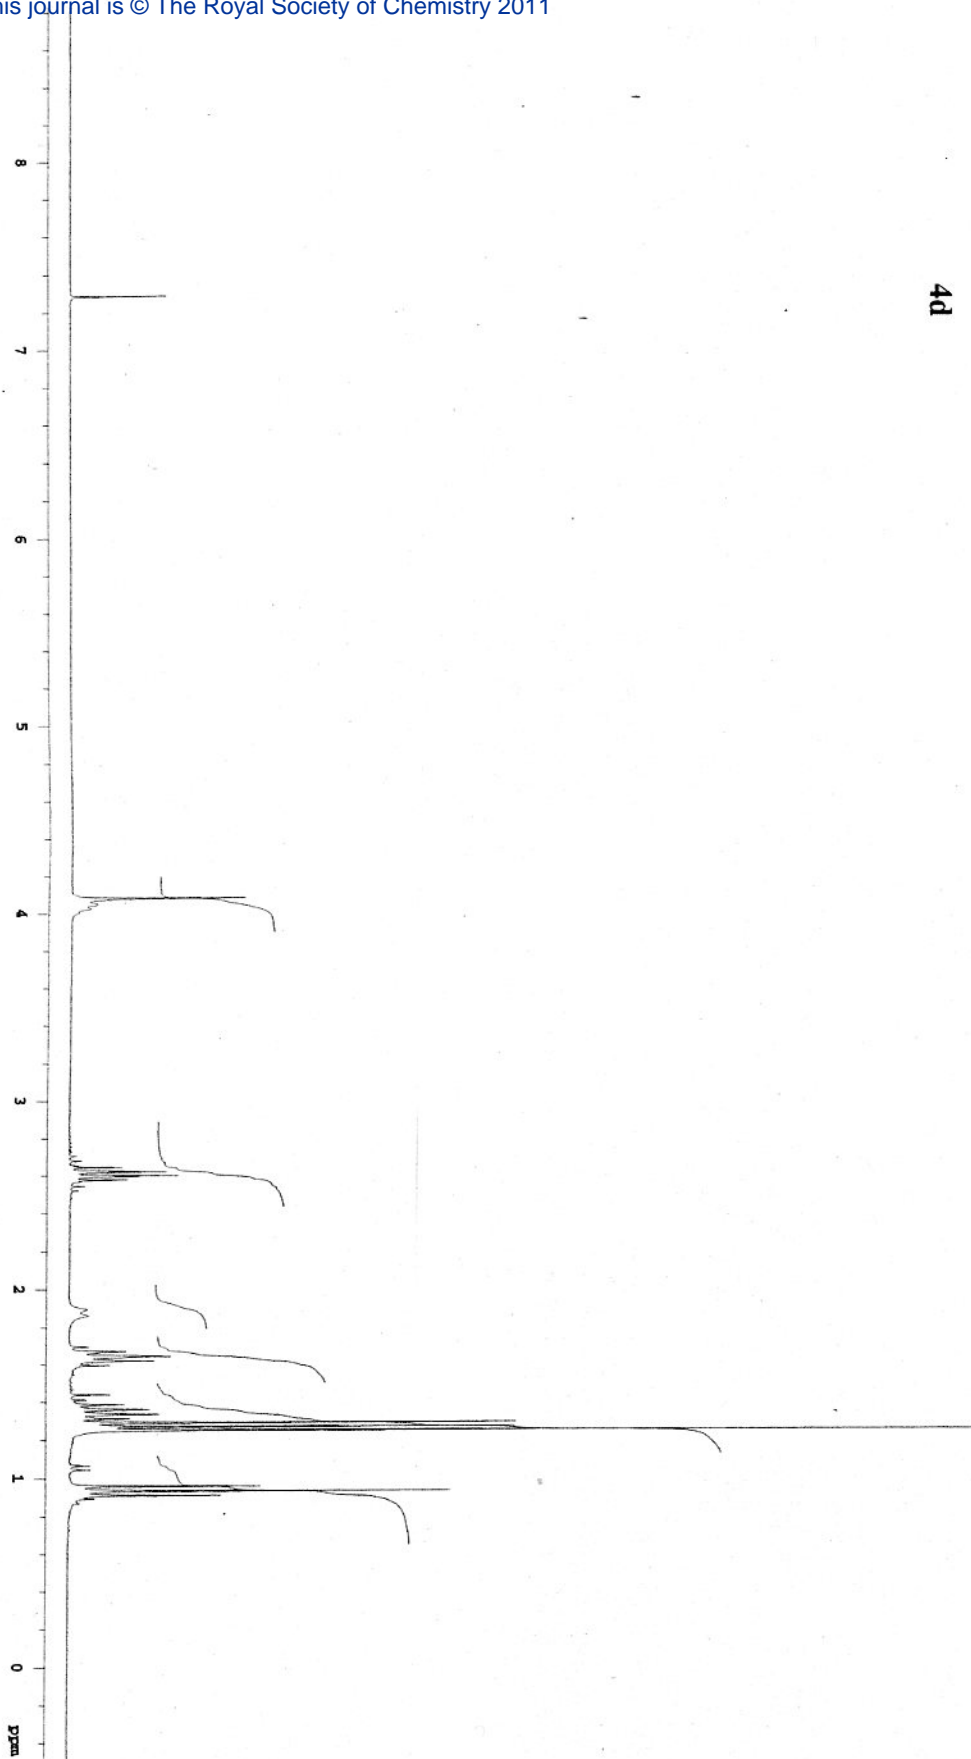

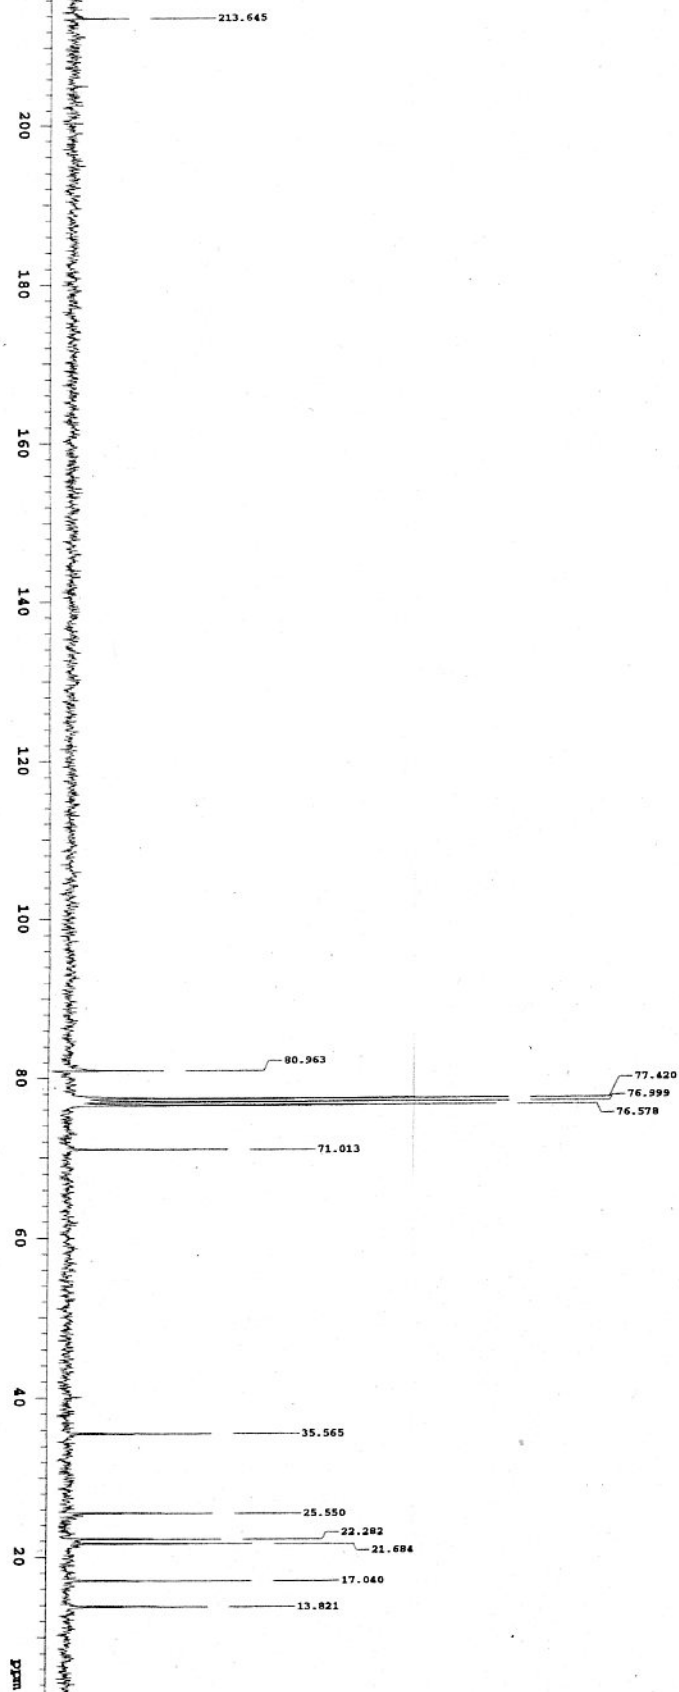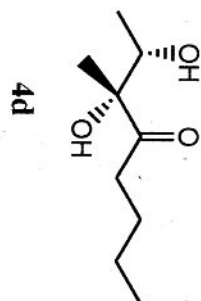

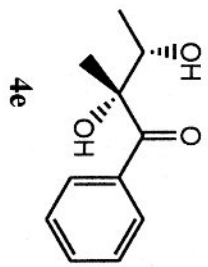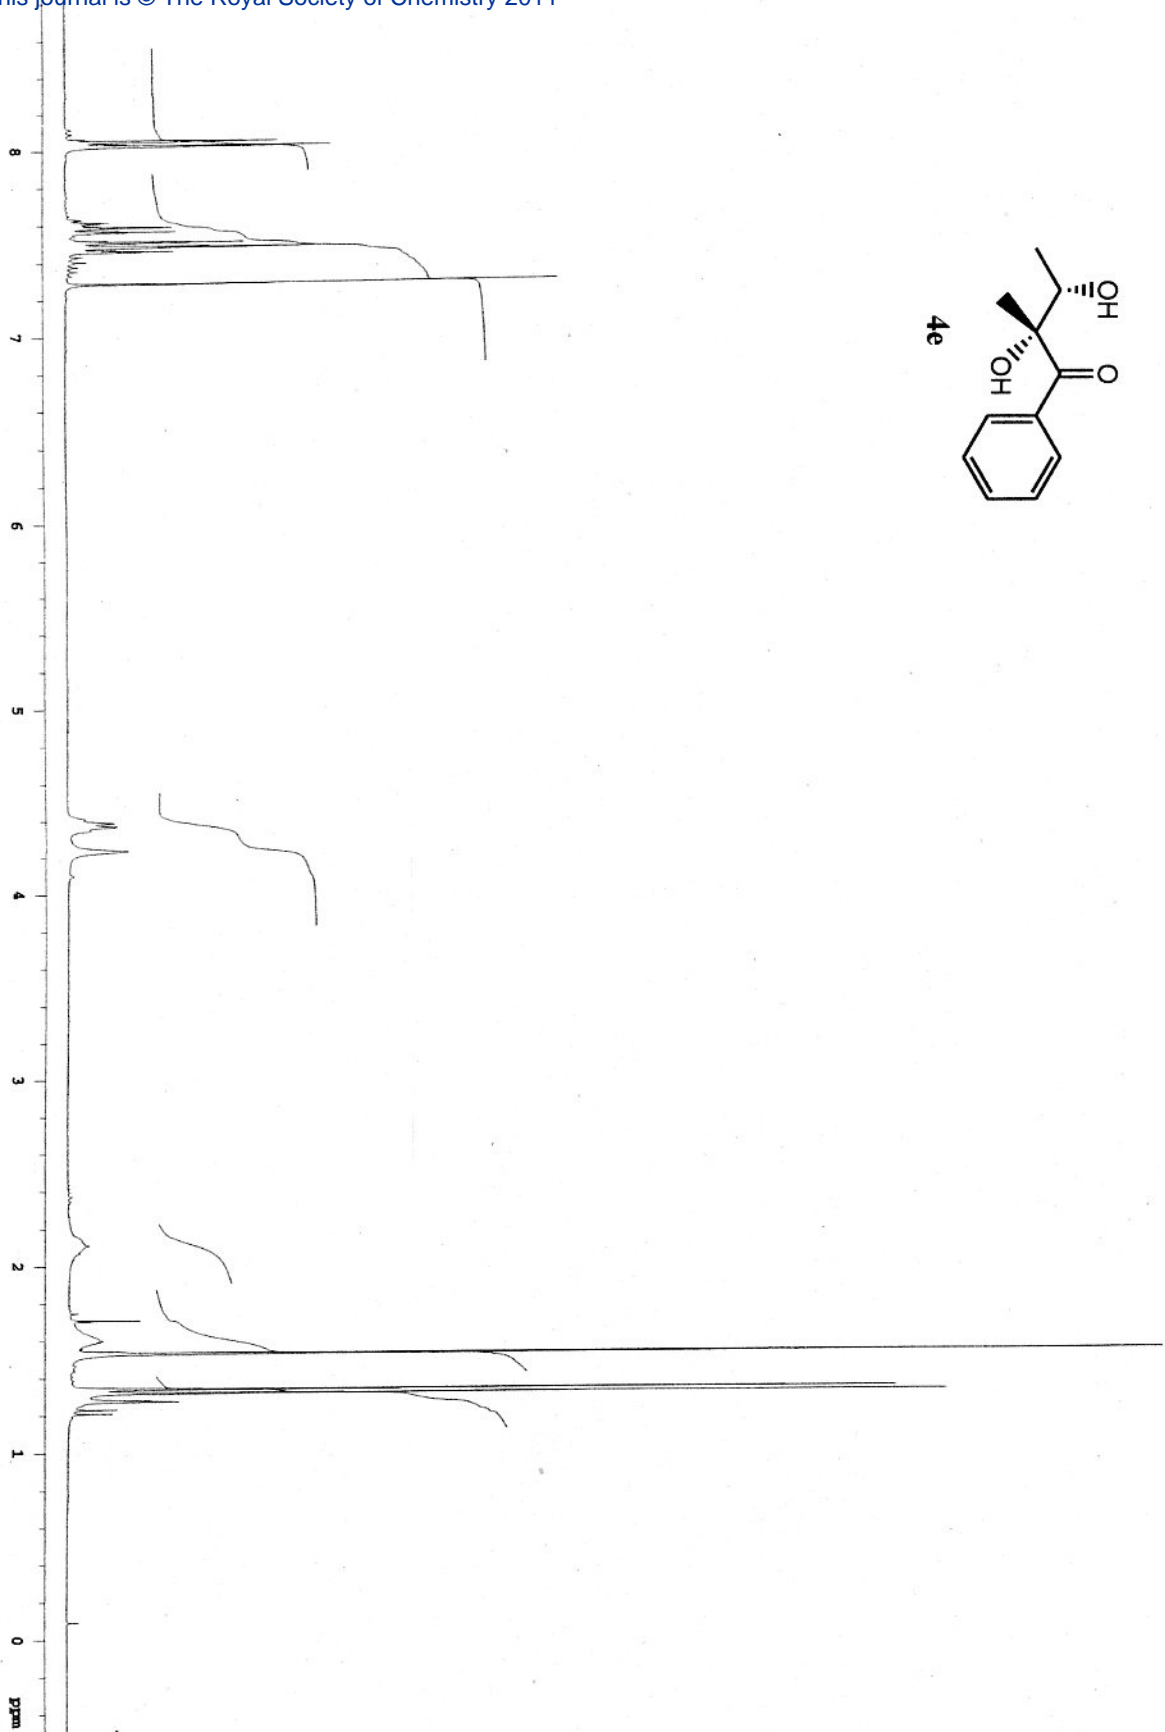

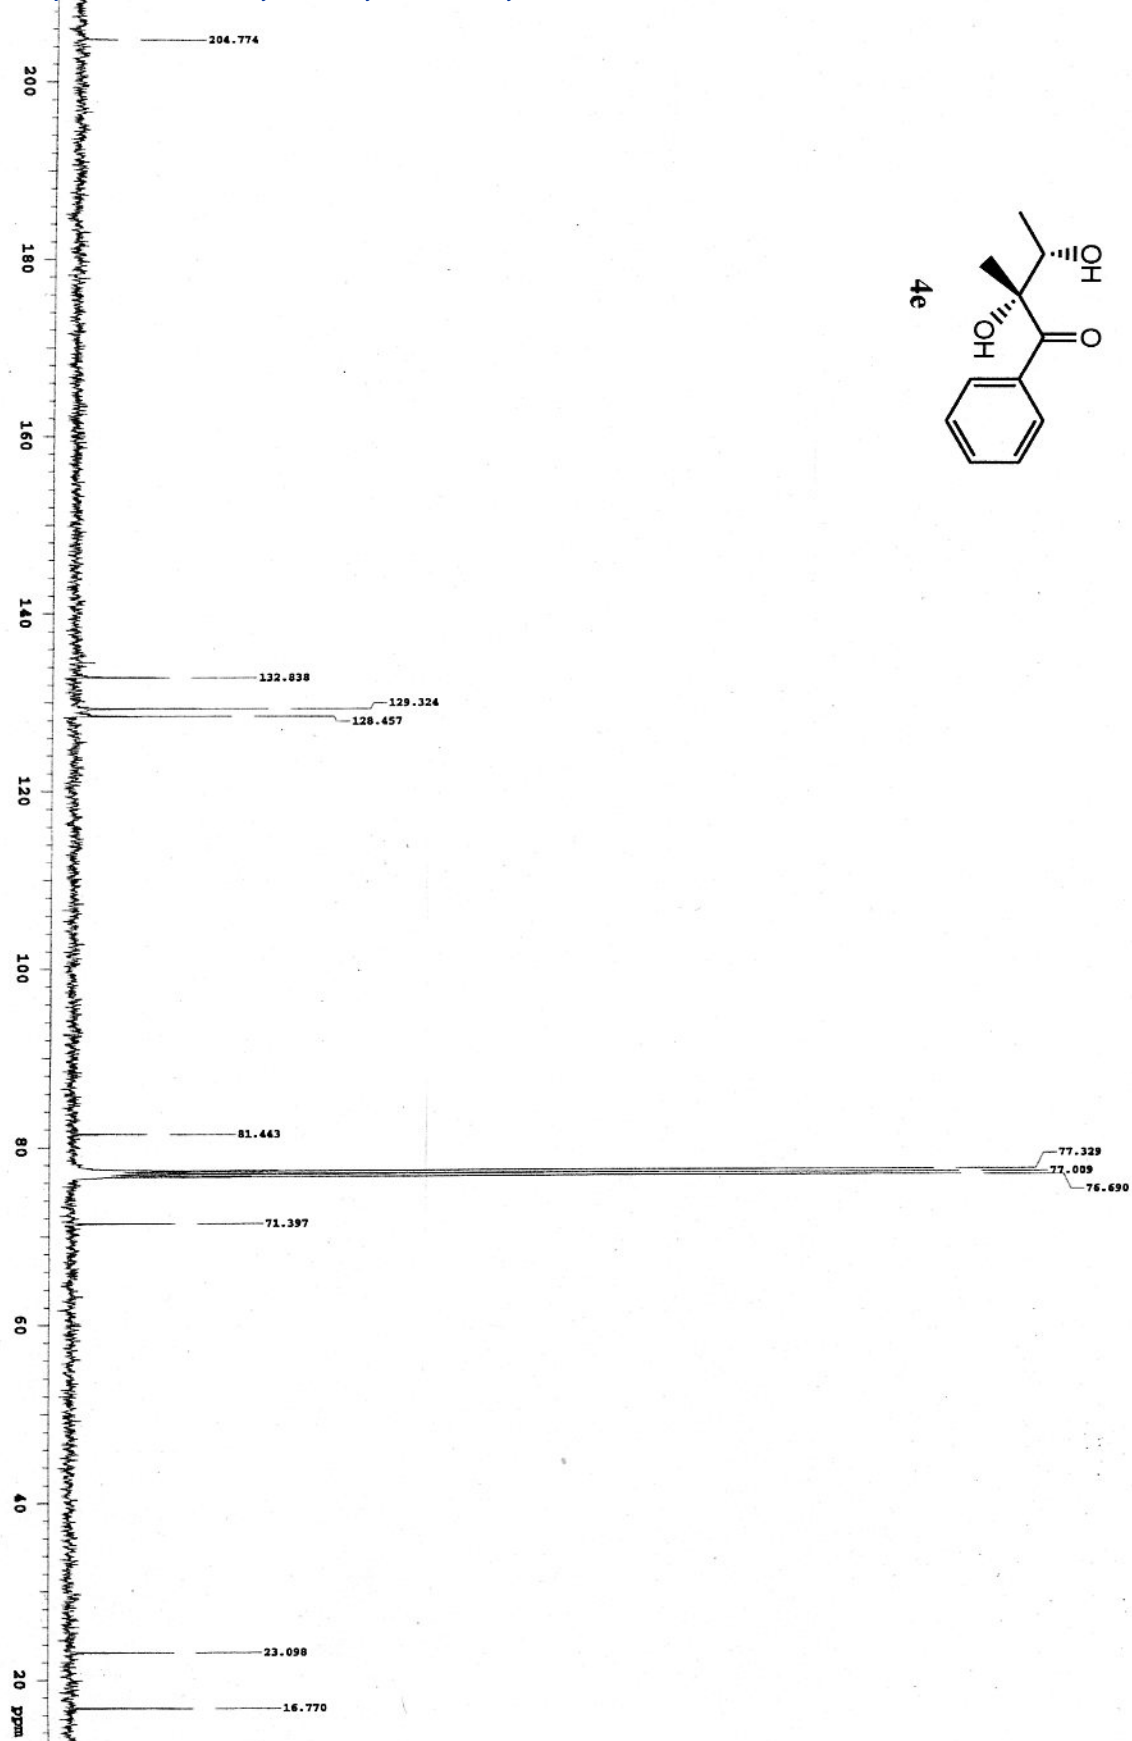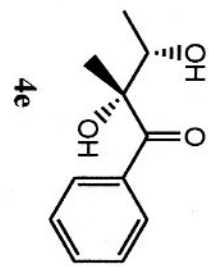



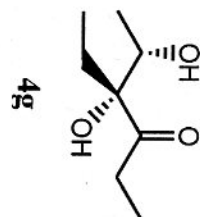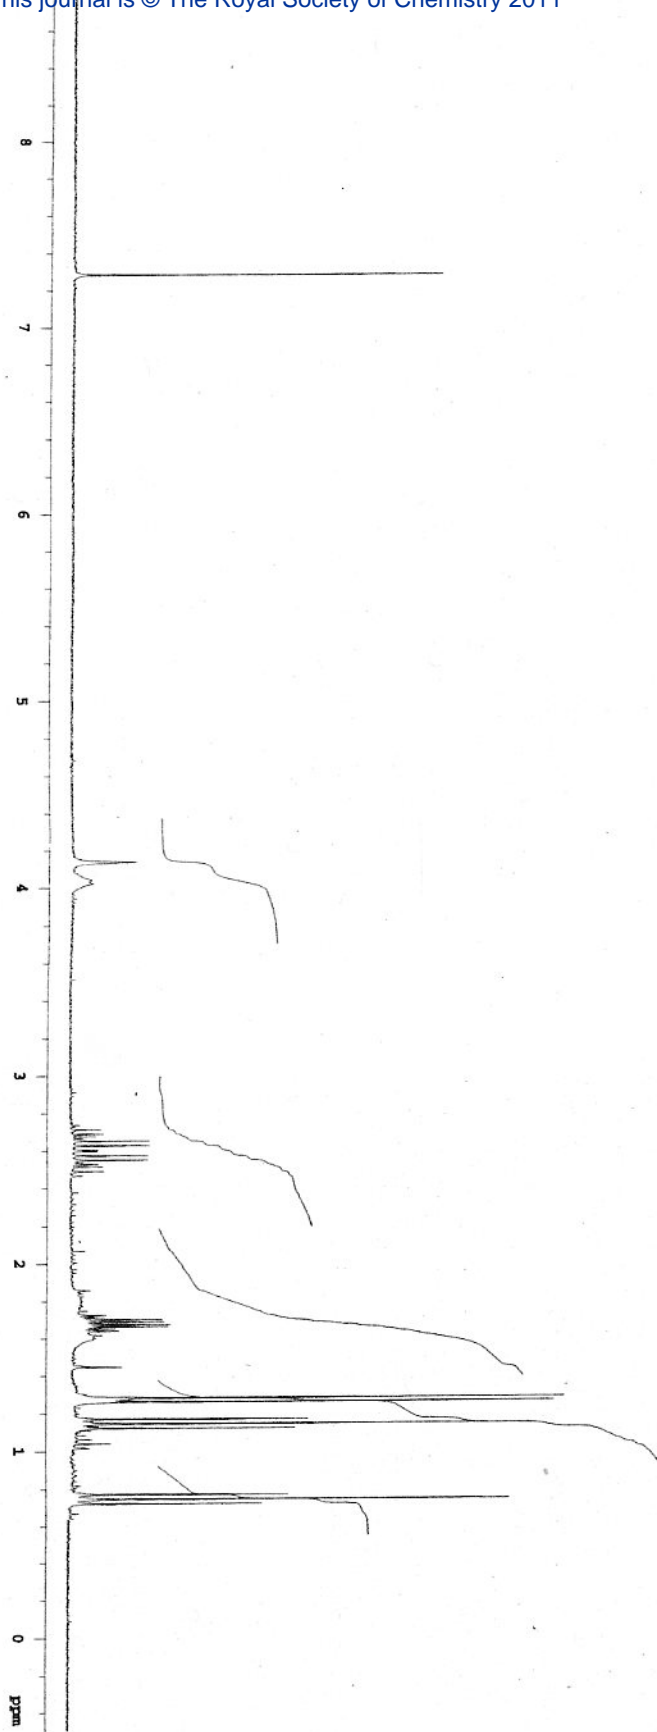

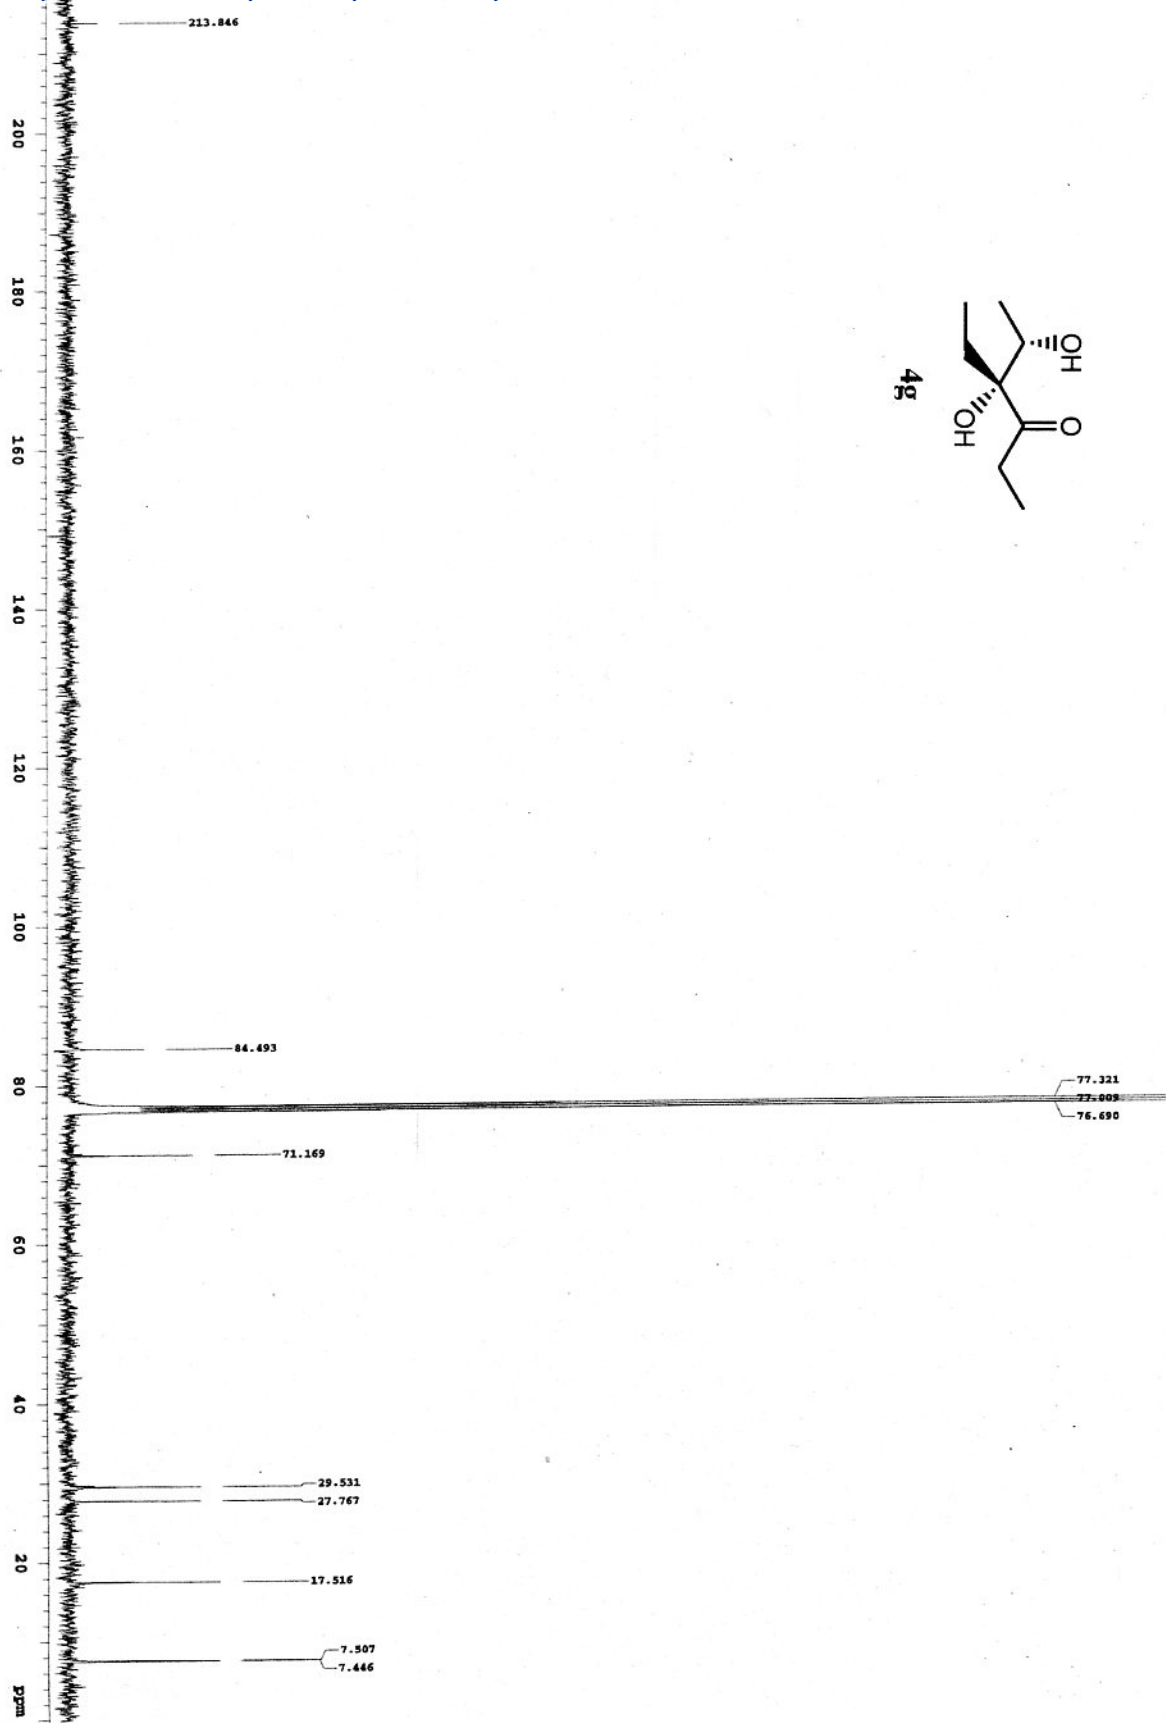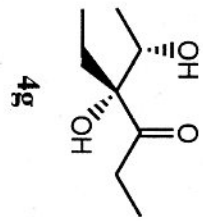

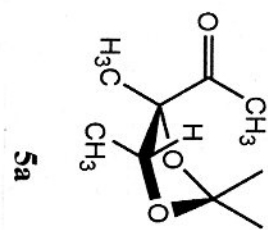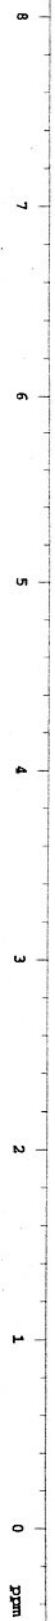

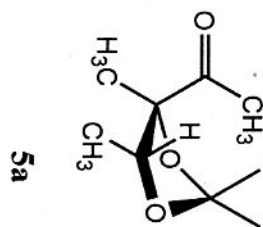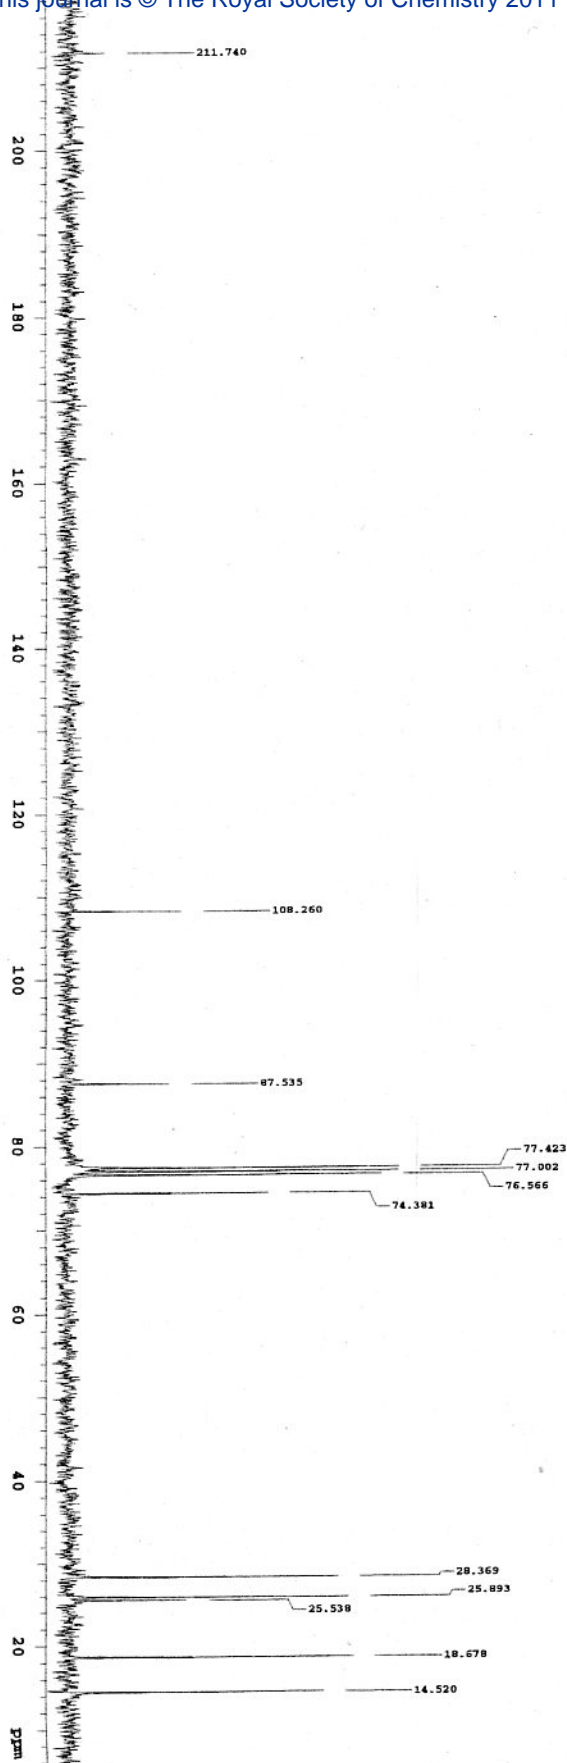

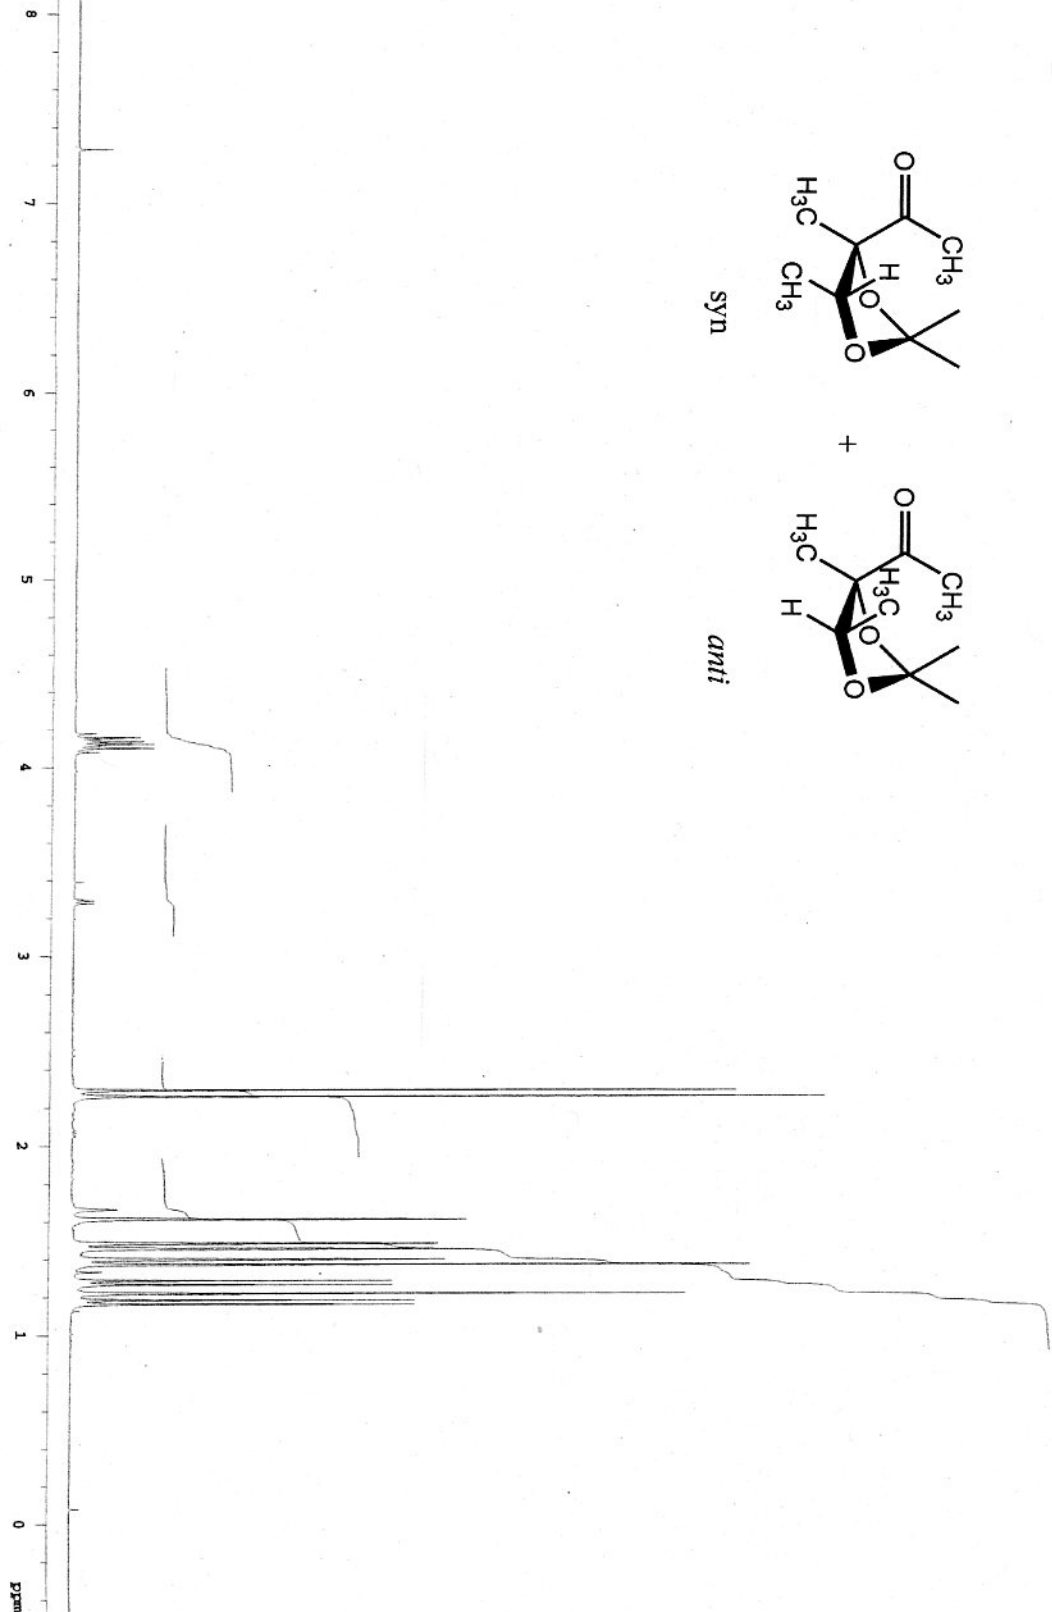

8  
7  
6  
5  
4  
3  
2  
1  
0  
ppm

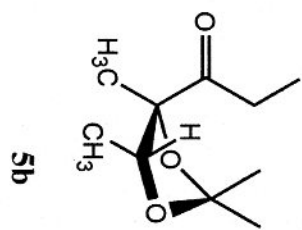

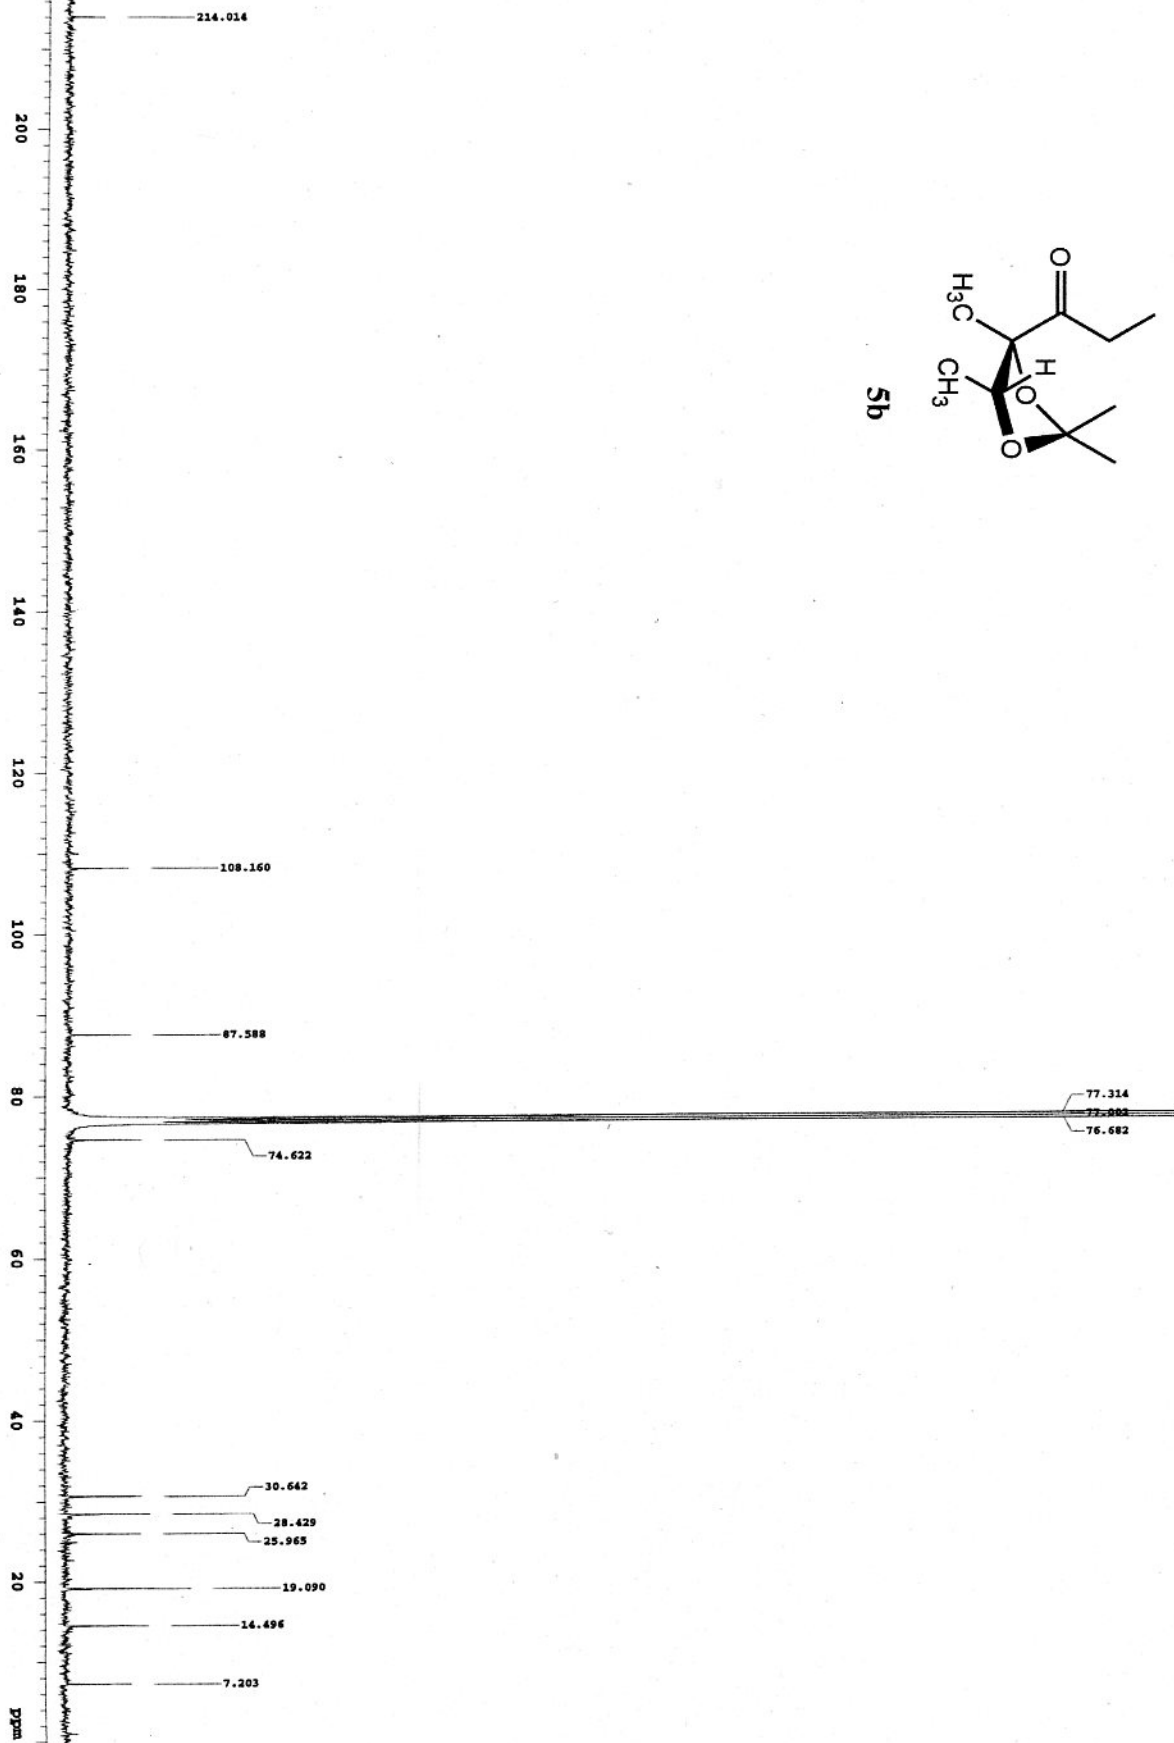

8  
7  
6  
5  
4  
3  
2  
1  
0  
ppm

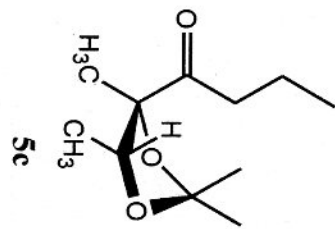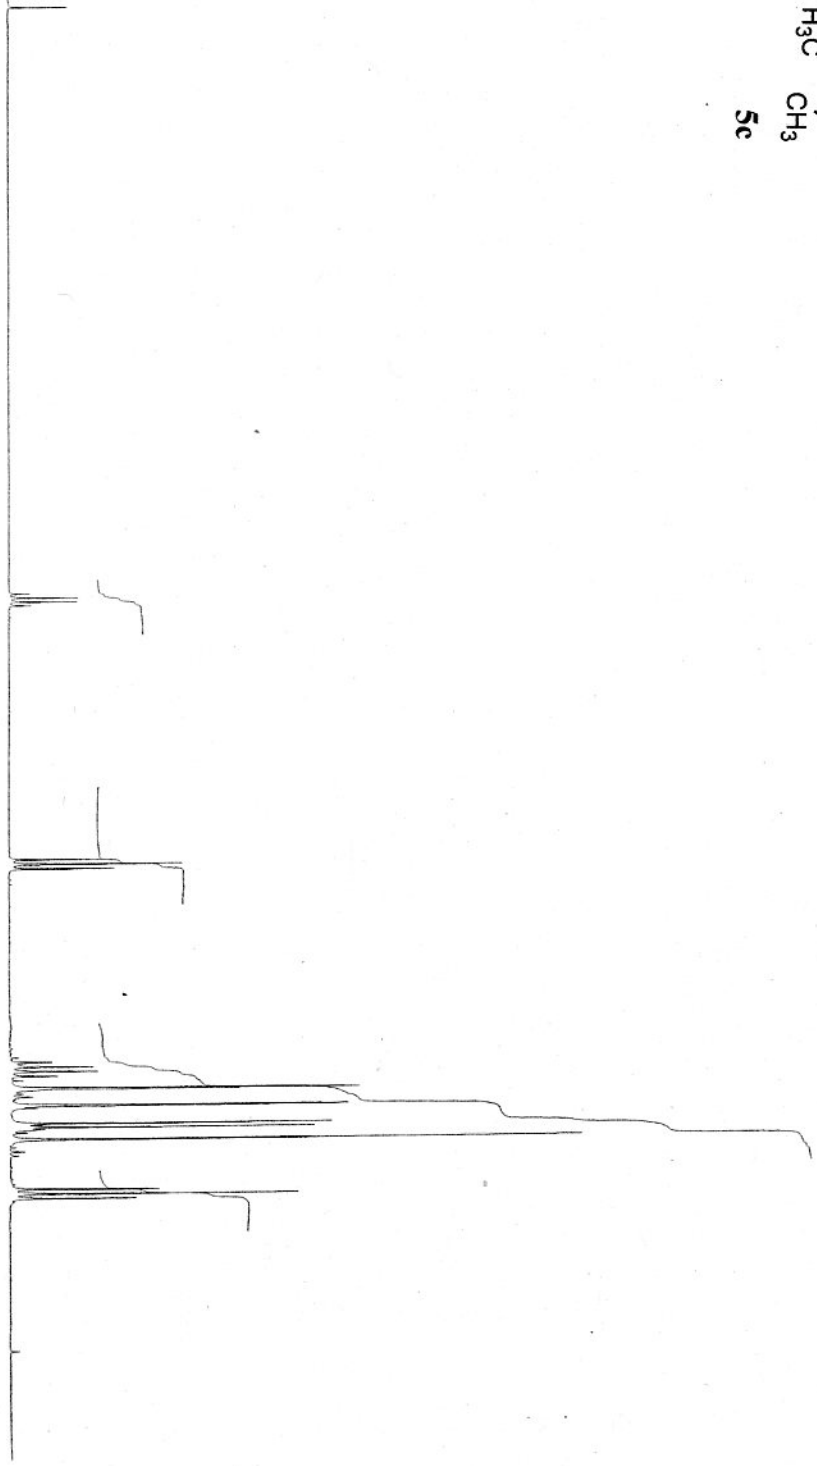



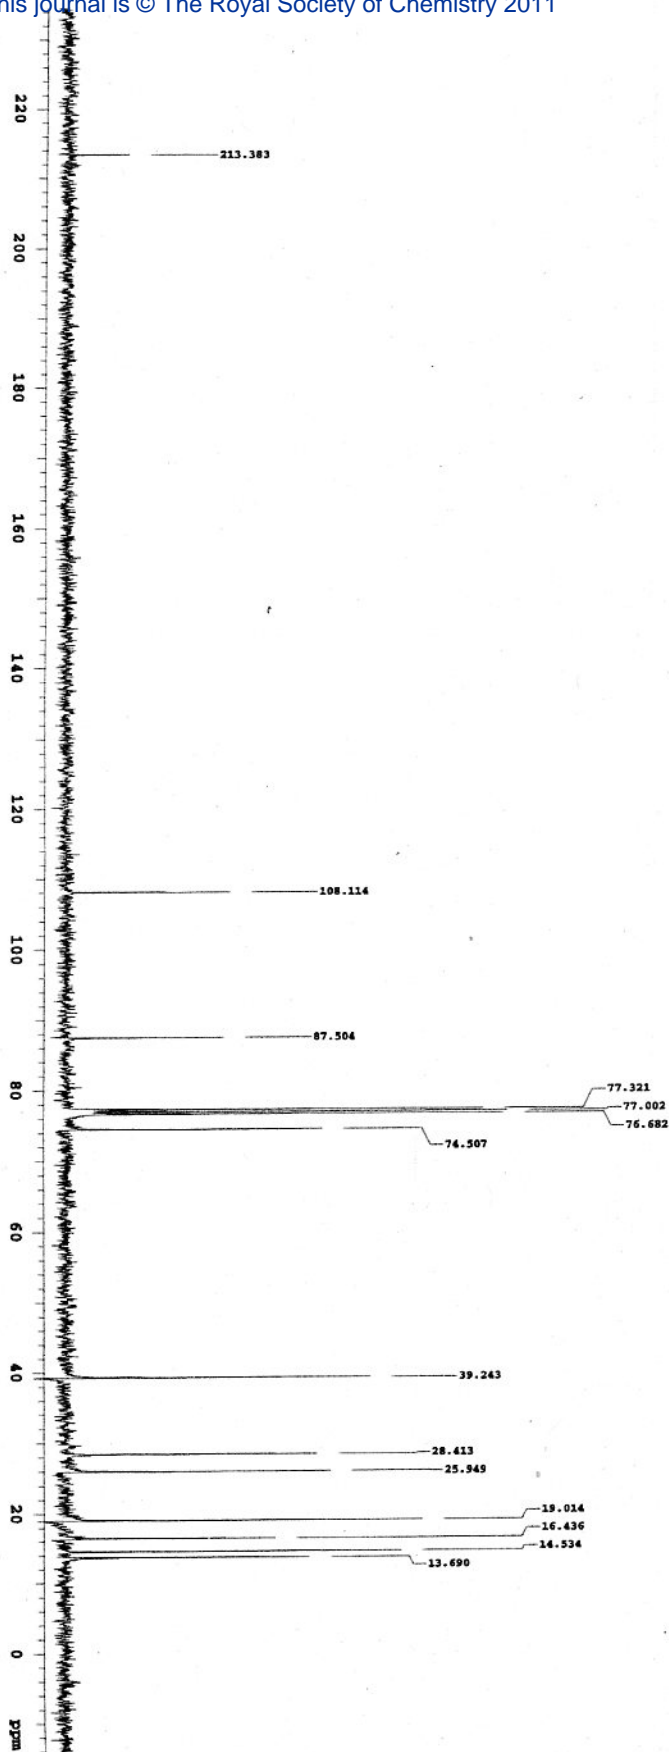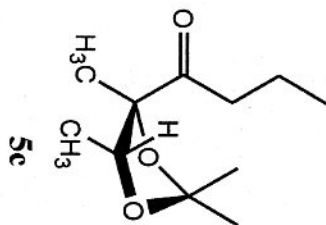

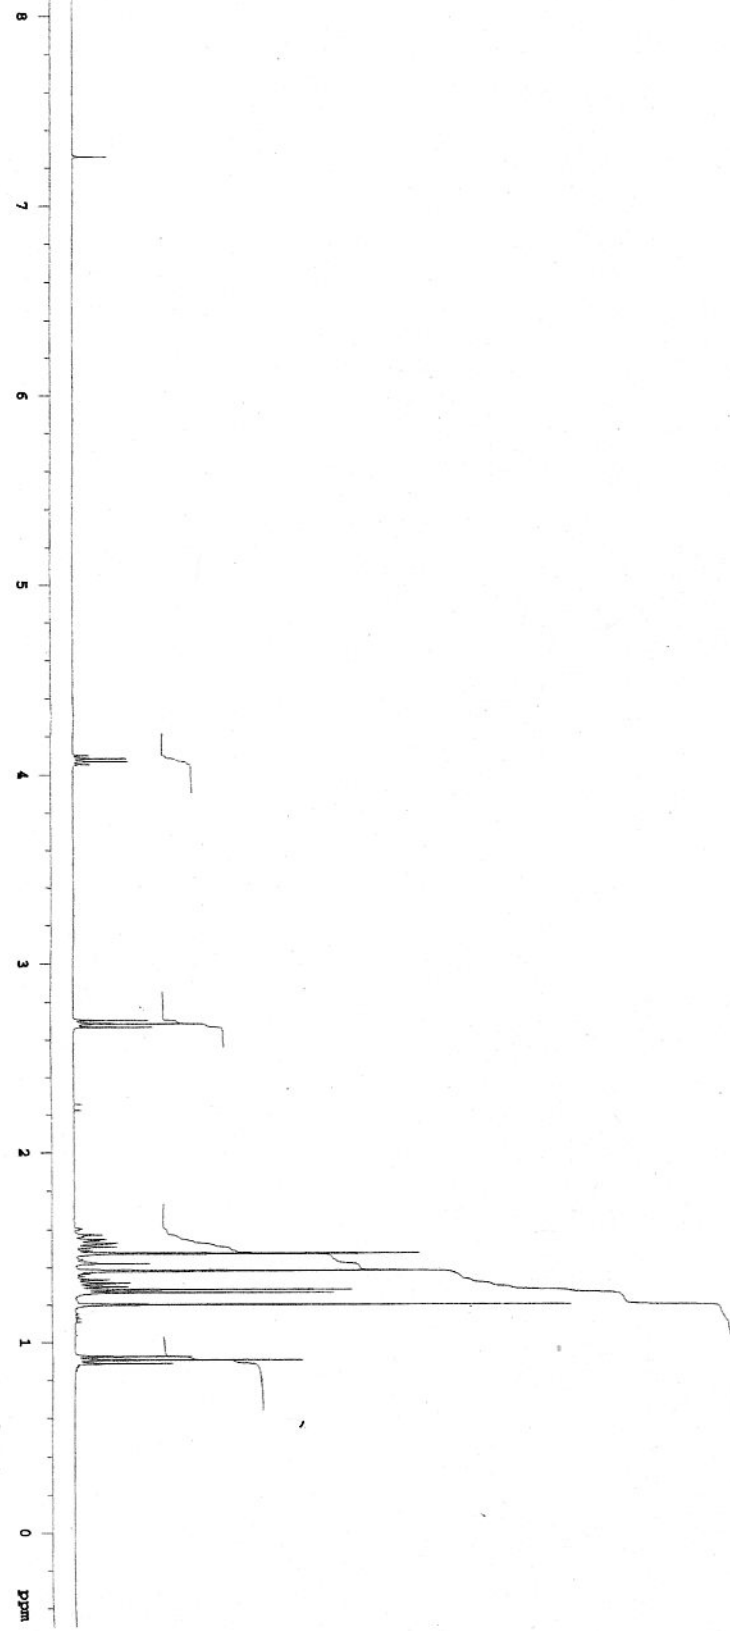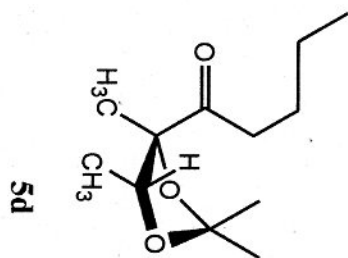

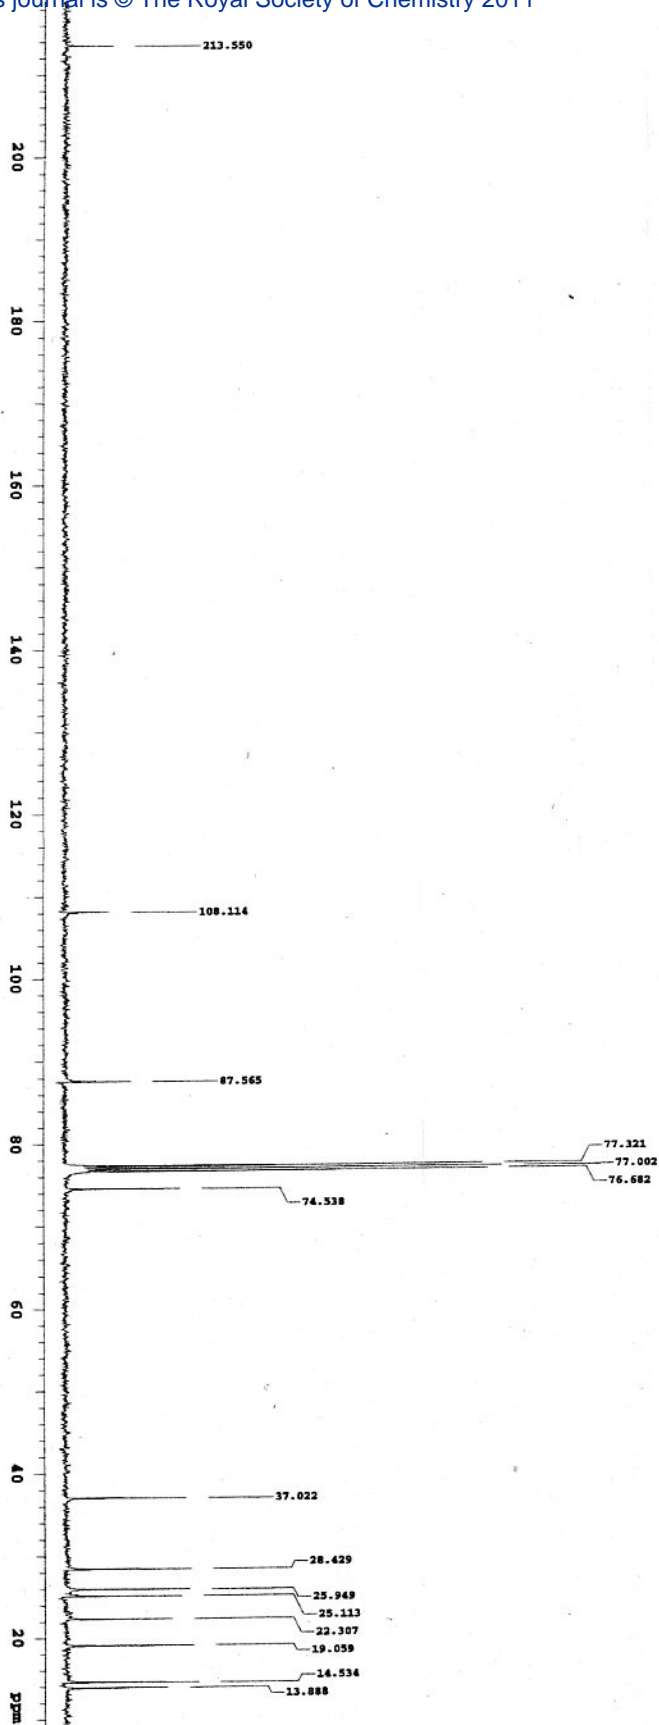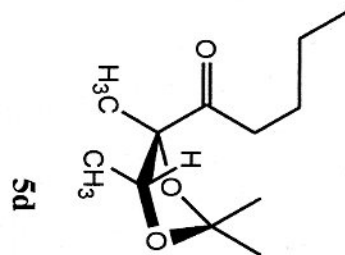

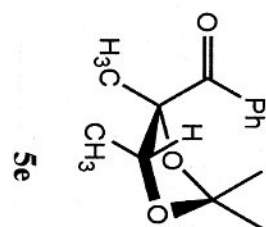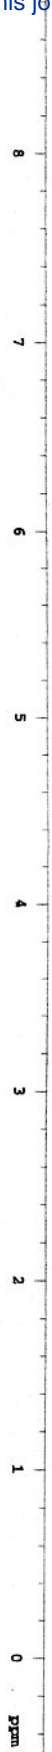

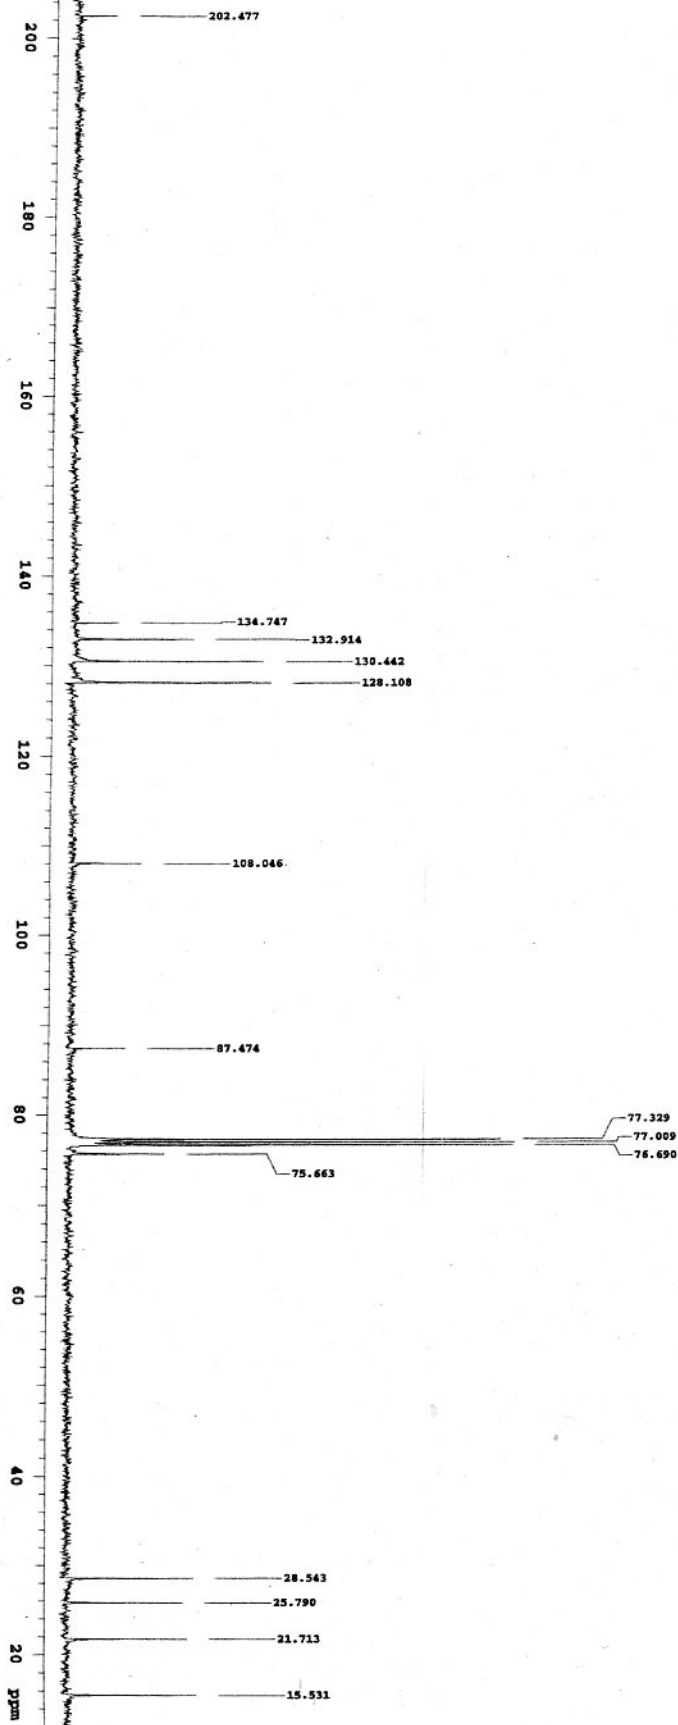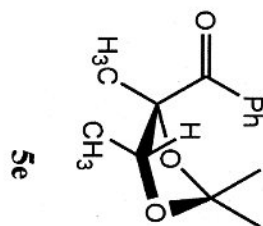

8  
7  
6  
5  
4  
3  
2  
1  
0  
ppm

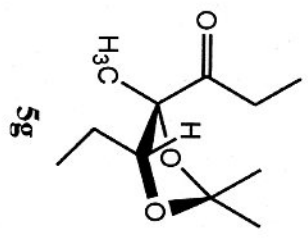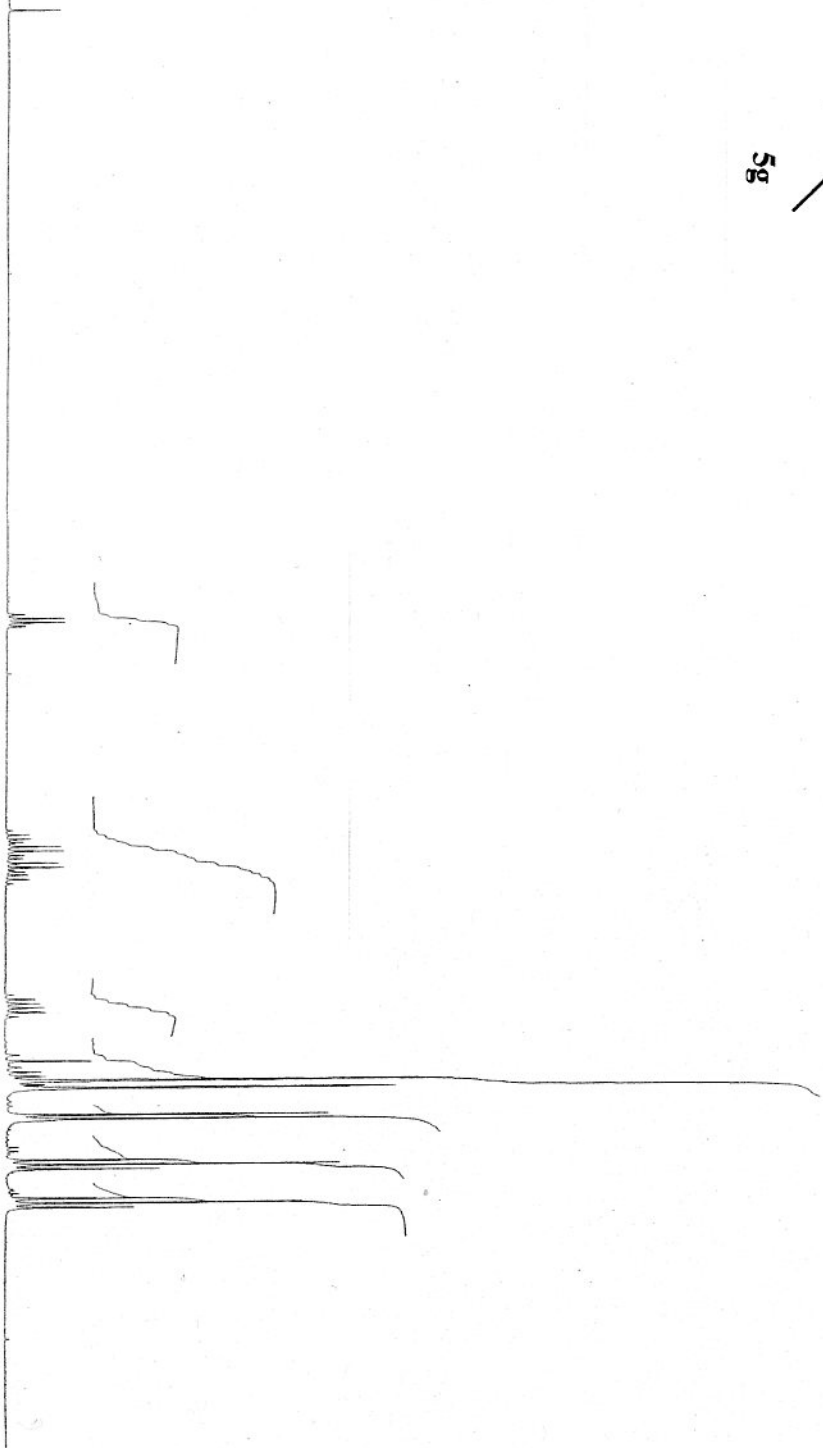

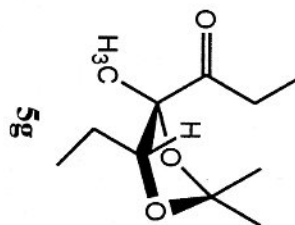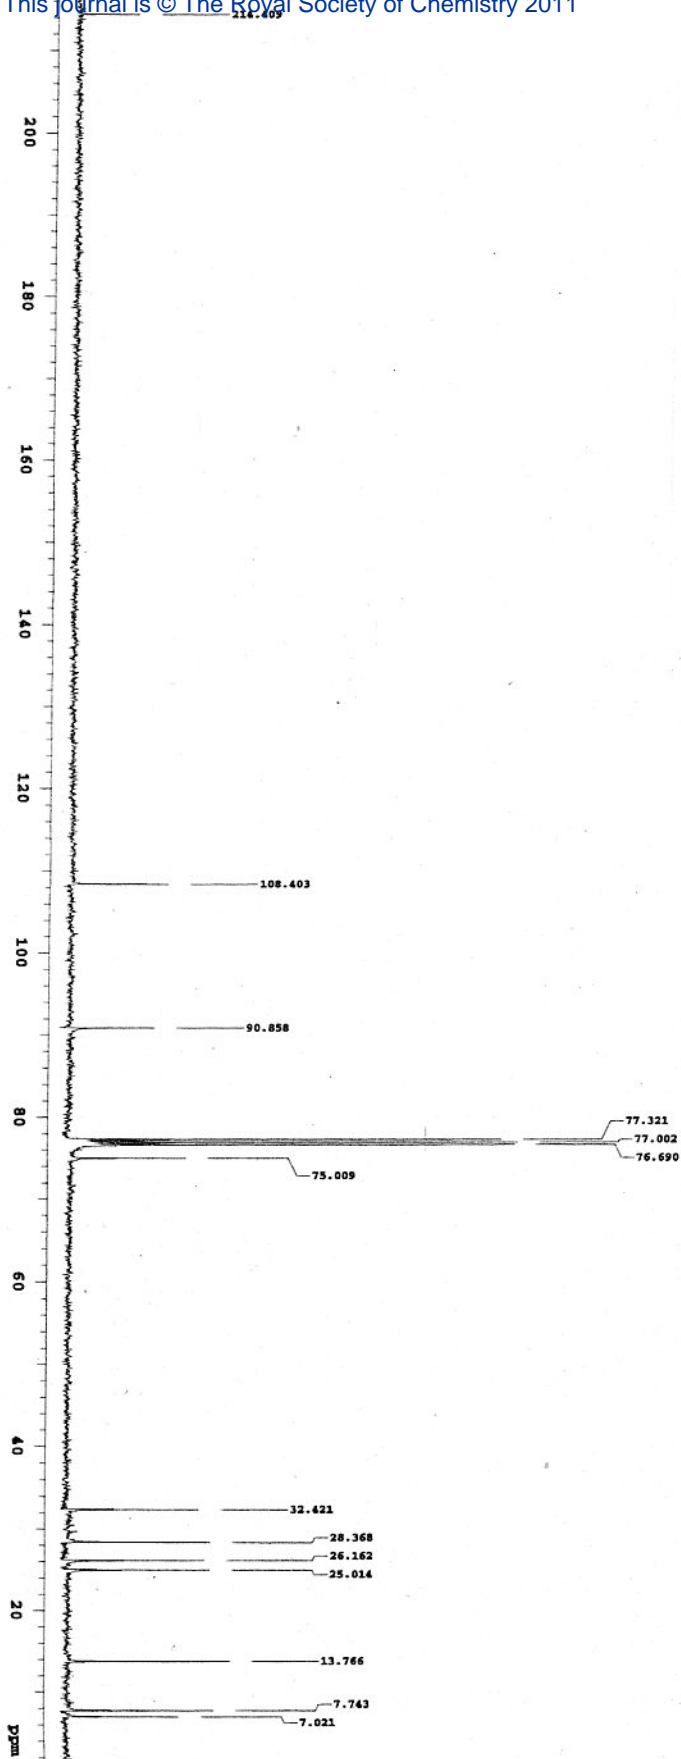

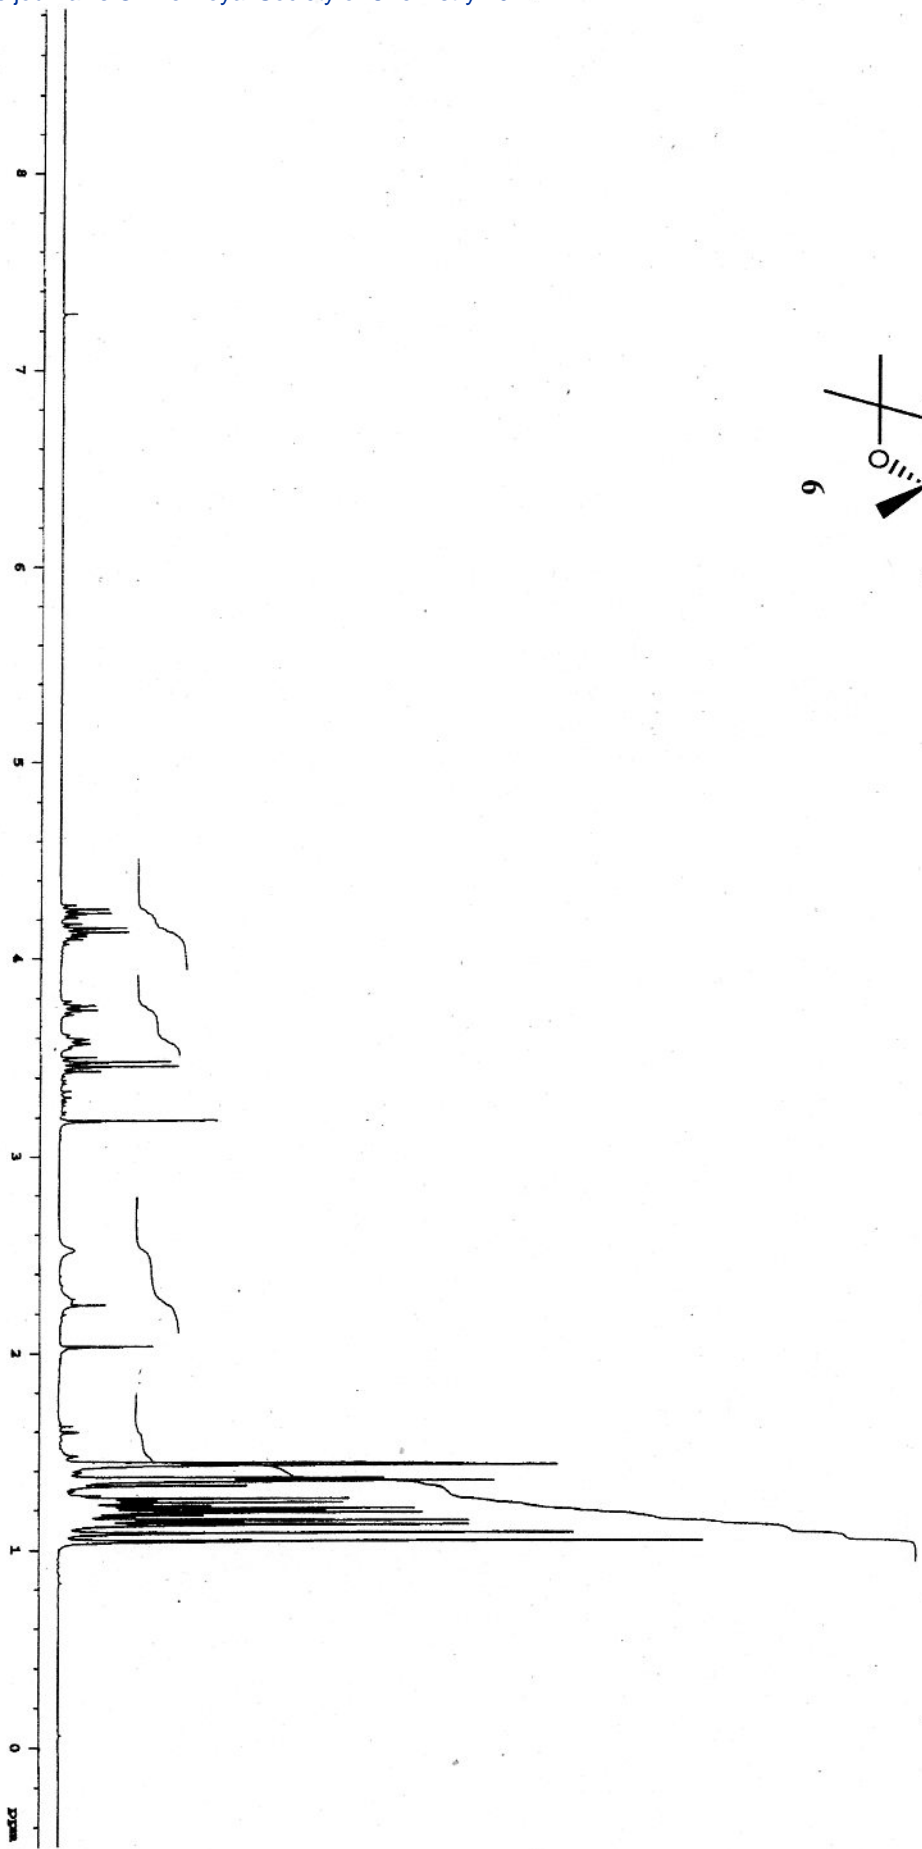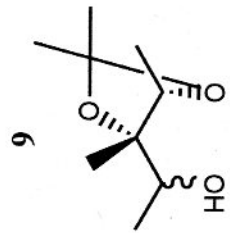



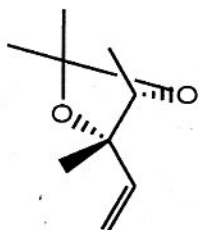

**2,2,4,5-tetramethyl-4-vinyl-1,3-dioxolane**

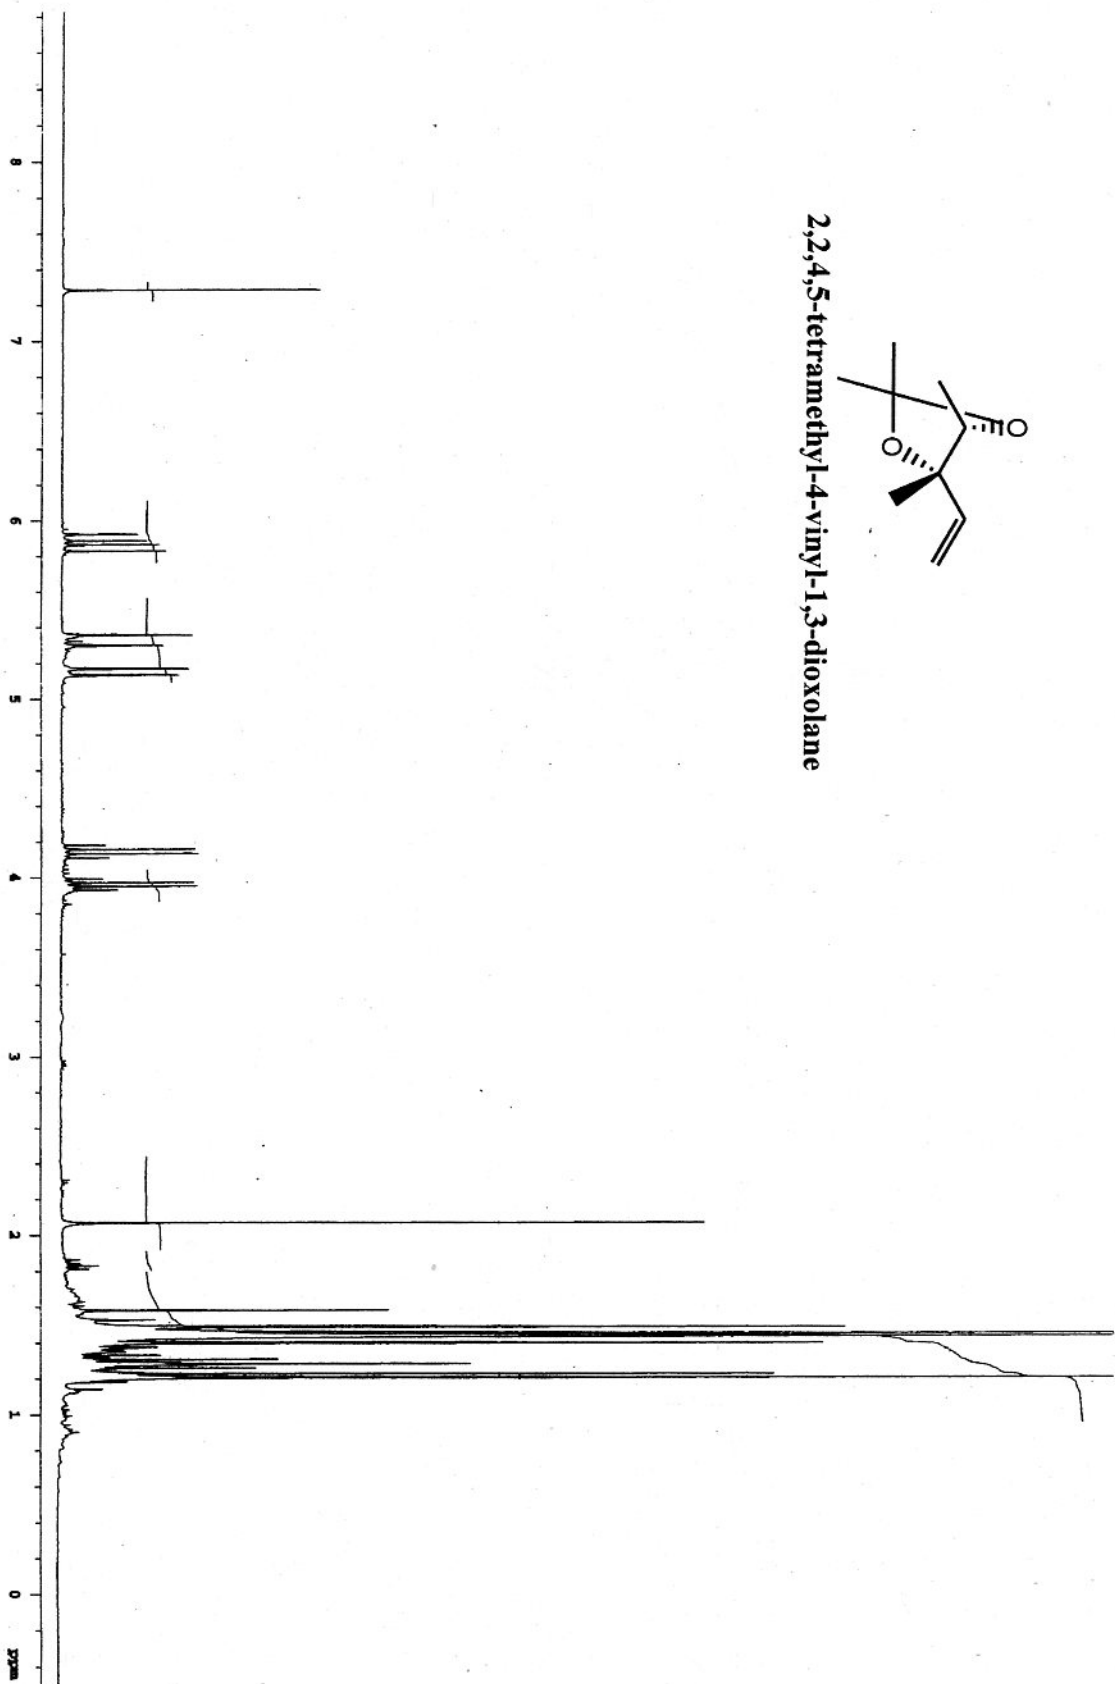

STANDARD IN ORBIT  
Pulse Sequence: zgpg30

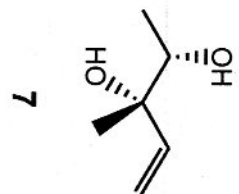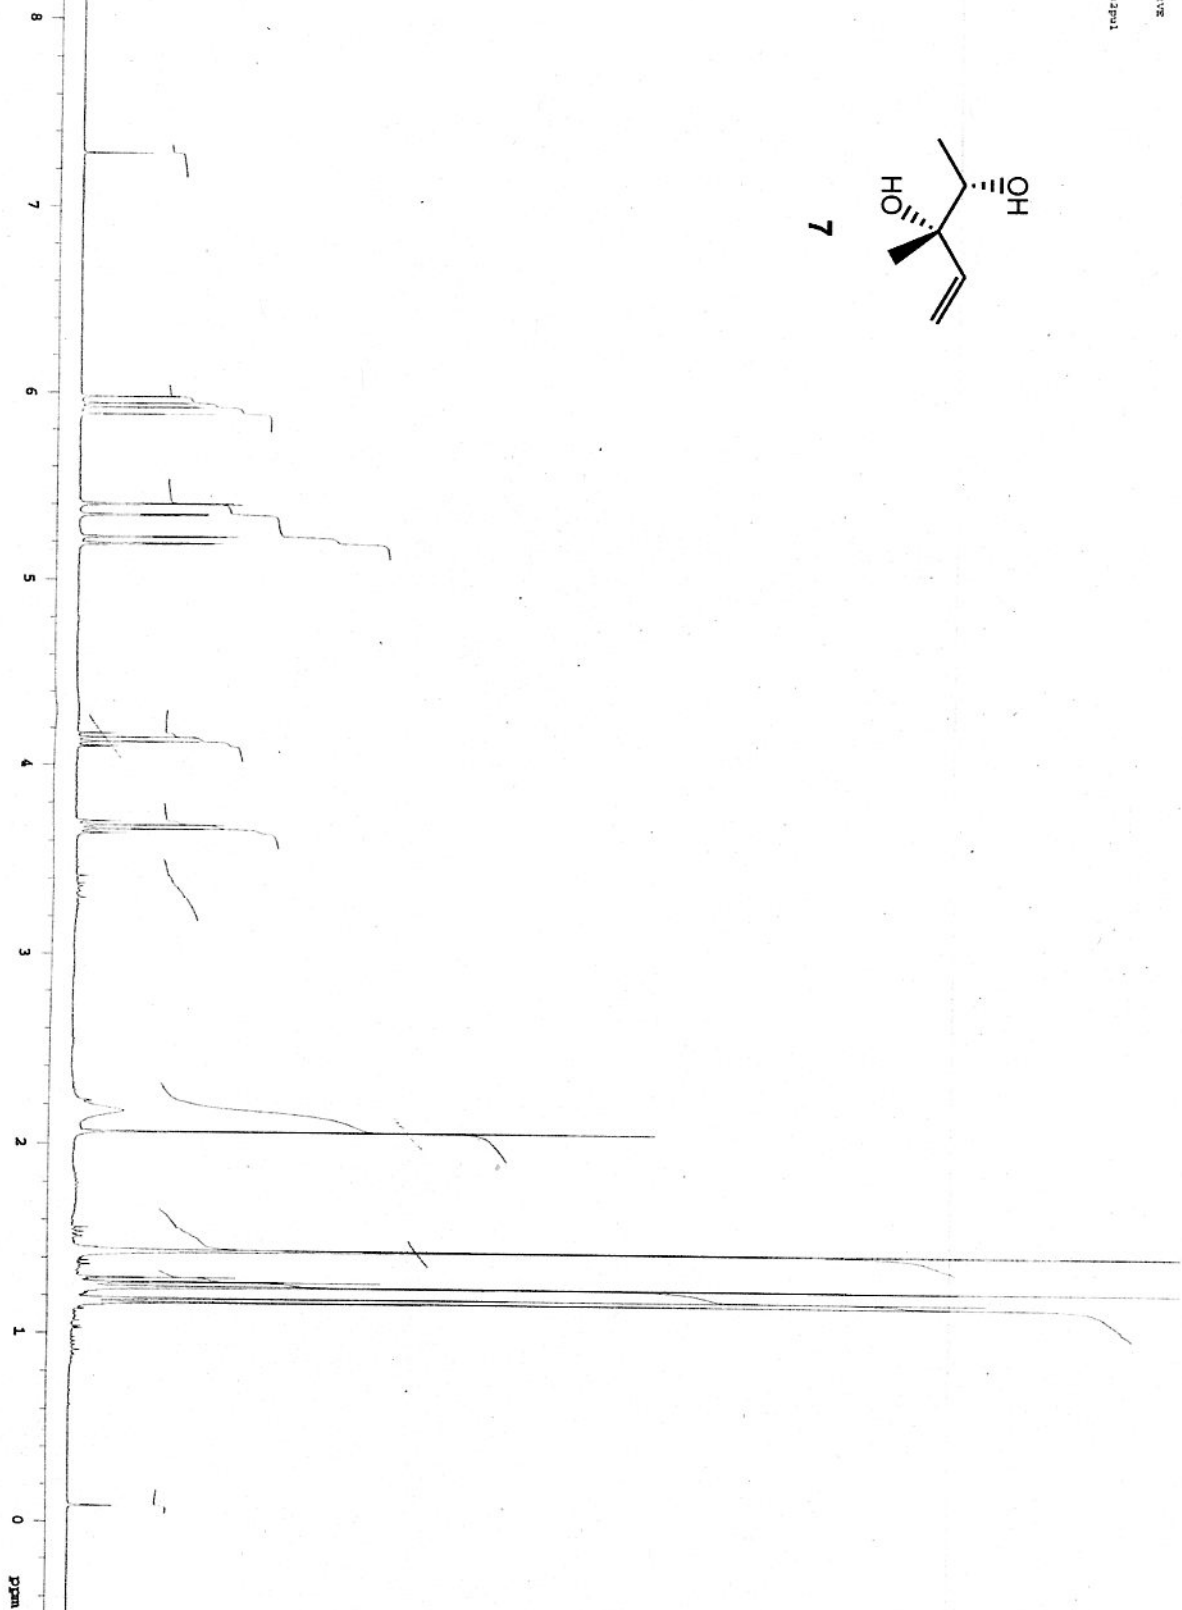

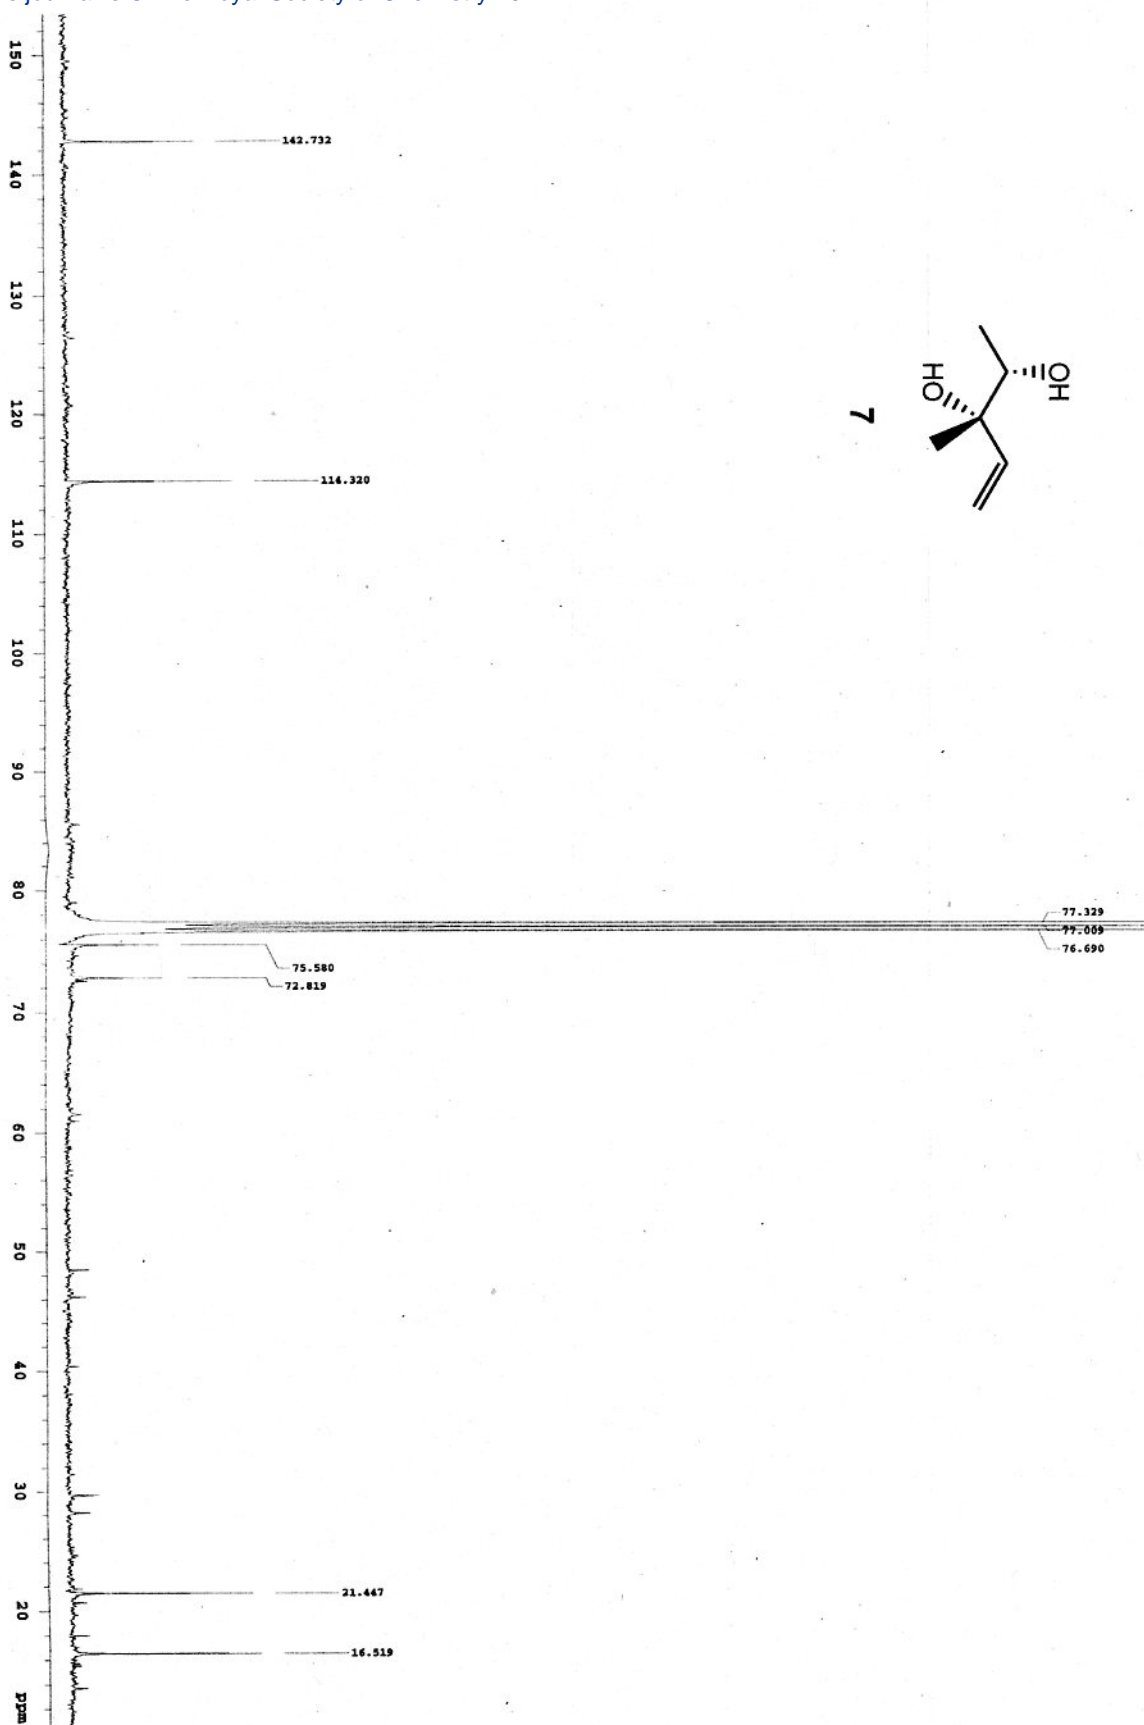

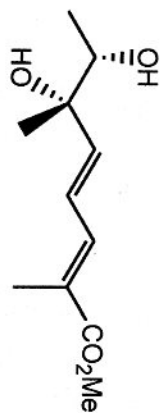

**8 (+)-citroediol**

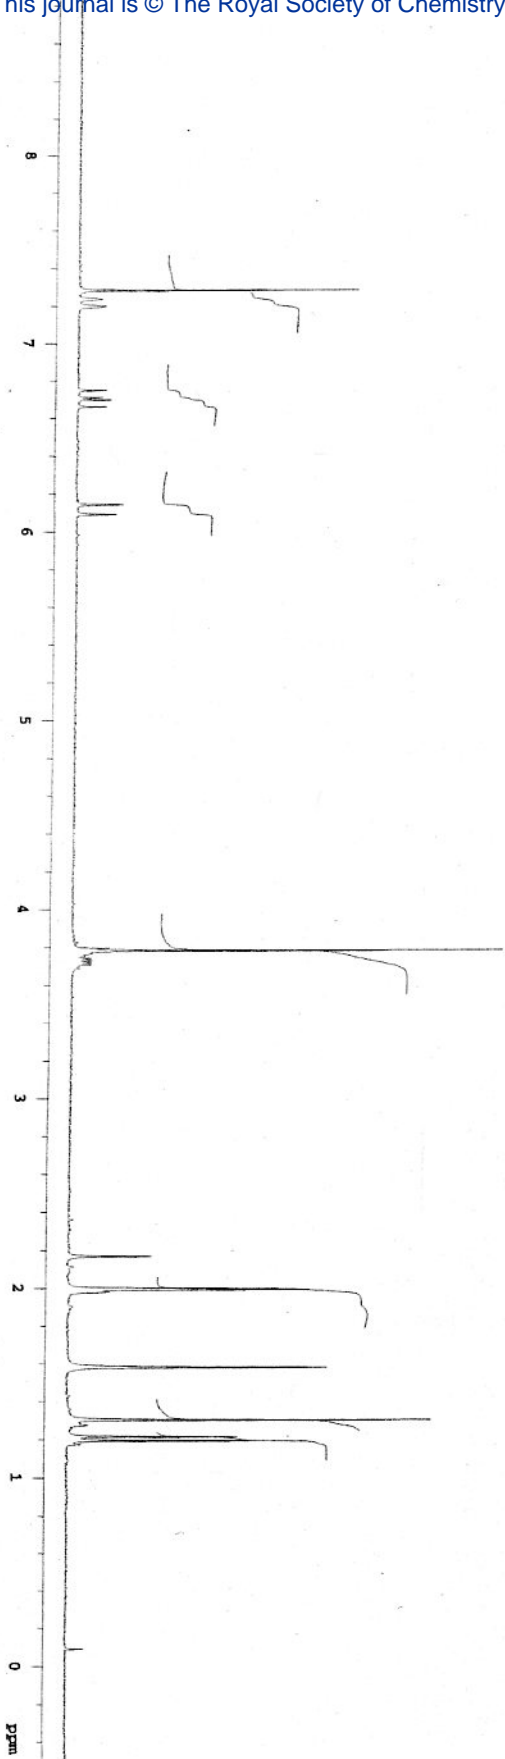

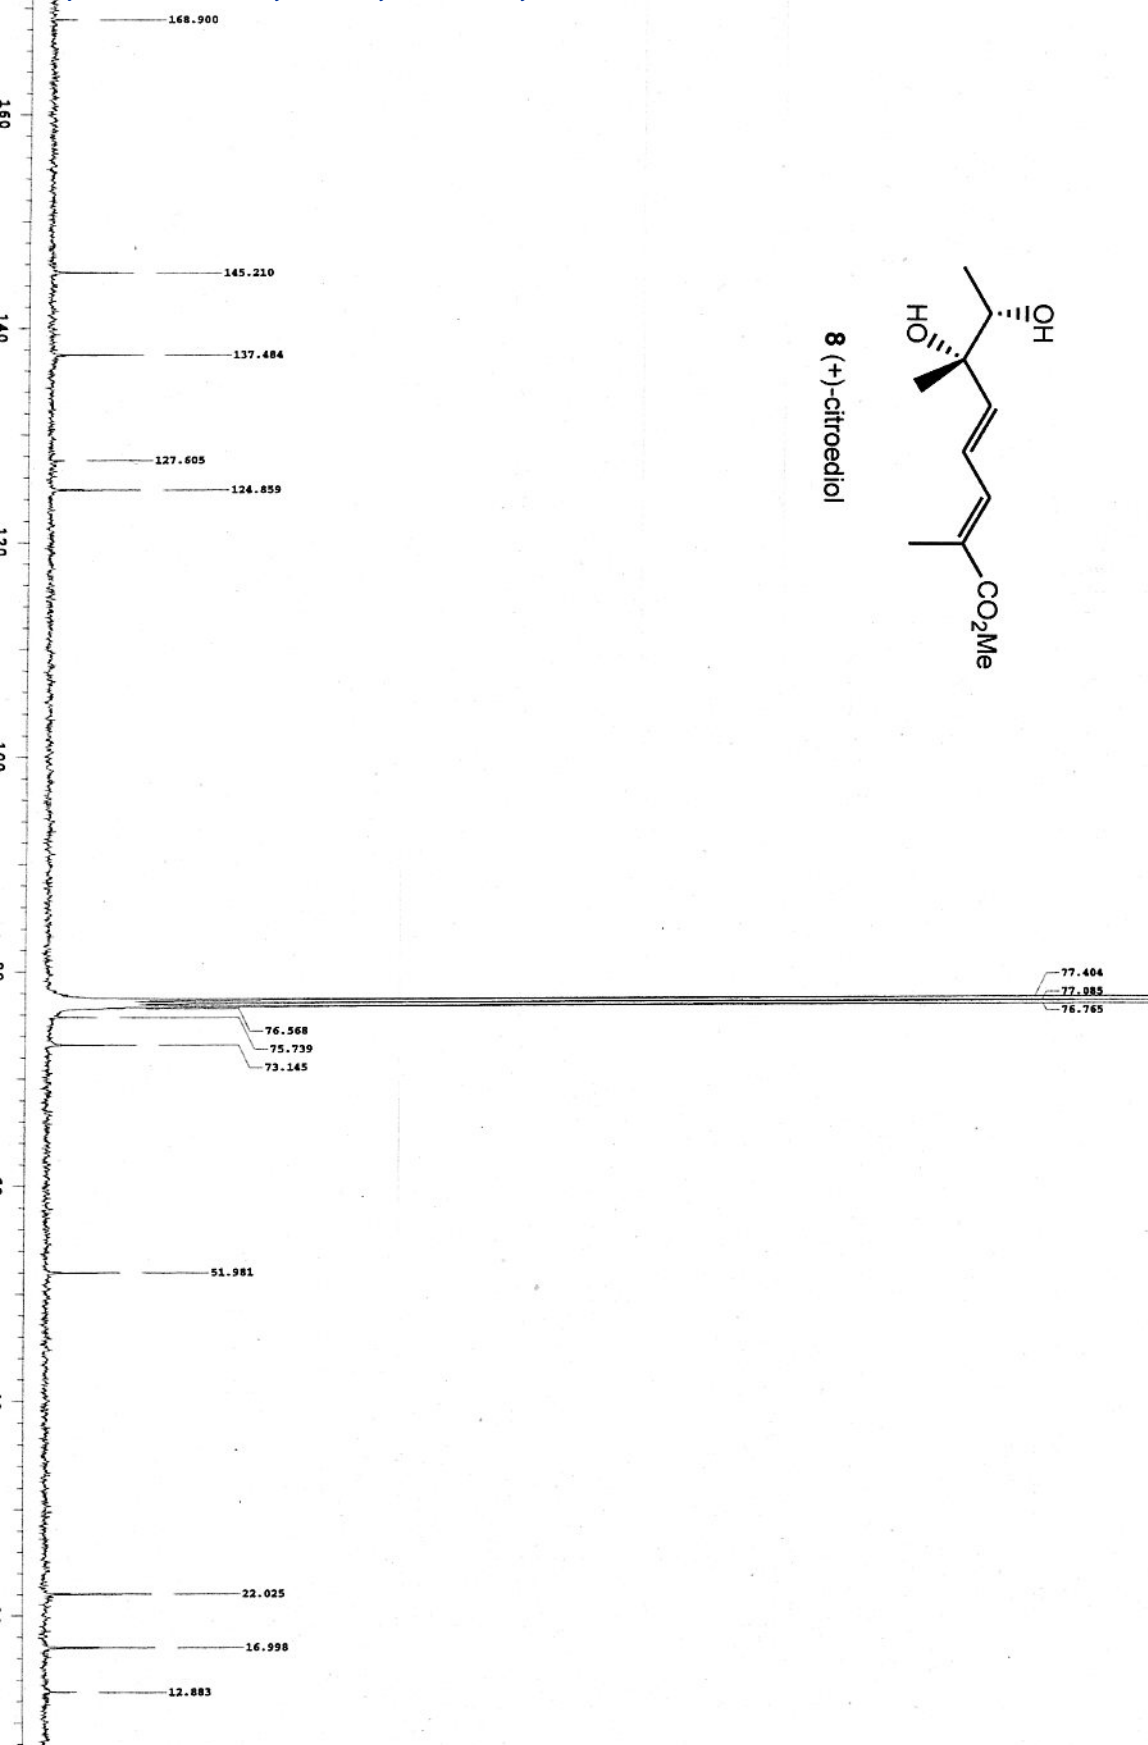

Supplement: c1ob05928a.pdf [file c1ob05928a.pdf]
